# Supplementary material
Source: PubMed Central journal article supplement (PMC6168828)
Supplement: mmc5.pdf [file mmc5.pdf]

## Genomic Features of Response to Combination Immunotherapy in Patients with Advanced Non-Small-Cell Lung Cancer

### Highlights

- High TMB correlates with efficacy of PD-1 plus CTLA-4 blockade in NSCLC
- TMB and PD-L1 are independent variables
- In multivariate analysis, TMB associated most strongly with efficacy

### Authors

Matthew D. Hellmann, Tavi Nathanson, Hira Rizvi, ..., Nicholas McGranahan, Alexandra Snyder, Jedd D. Wolchok

### Correspondence

hellmanm@mskcc.org

### In Brief

Hellmann et al. examine non-small-cell lung cancers treated with combined PD-1 and CTLA-4 blockade using whole-exome sequencing and find that high tumor mutation burden is the strongest feature associated with improved objective response, durable benefit, and progression-free survival in multivariable analysis.

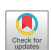

# Genomic Features of Response to Combination Immunotherapy in Patients with Advanced Non-Small-Cell Lung Cancer

Matthew D. Hellmann,<sup>1,2,3,4,17,\*</sup> Tavi Nathanson,<sup>5</sup> Hira Rizvi,<sup>3</sup> Benjamin C. Creelan,<sup>6</sup> Francisco Sanchez-Vega,<sup>7,8</sup> Arun Ahuja,<sup>5</sup> Ai Ni,<sup>9</sup> Jacki B. Novik,<sup>5</sup> Levi M.B. Mangarin,<sup>10</sup> Mohsen Abu-Akeel,<sup>10</sup> Cailian Liu,<sup>10</sup> Jennifer L. Sauter,<sup>11</sup> Natasha Rekhtman,<sup>11</sup> Eliza Chang,<sup>5</sup> Margaret K. Callahan,<sup>1,2,4</sup> Jamie E. Chaft,<sup>1,2,3</sup> Martin H. Voss,<sup>1,2</sup> Megan Tenet,<sup>3</sup> Xue-Mei Li,<sup>12</sup> Kelly Covello,<sup>12</sup> Andrea Renninger,<sup>12</sup> Patrik Vitazka,<sup>12</sup> William J. Geese,<sup>12</sup> Hossein Borghaei,<sup>13</sup> Charles M. Rudin,<sup>1,2,3</sup> Scott J. Antonia,<sup>6</sup> Charles Swanton,<sup>14,15</sup> Jeff Hammerbacher,<sup>5,16</sup> Taha Merghoub,<sup>1,2,4,10</sup> Nicholas McGranahan,<sup>14</sup> Alexandra Snyder,<sup>1</sup> and Jedd D. Wolchok<sup>1,2,4,10</sup>

<sup>1</sup>Department of Medicine, Memorial Sloan Kettering Cancer Center, 885 2<sup>nd</sup> Avenue, New York, NY 10017, USA

<sup>2</sup>Weill Cornell School of Medicine, New York, NY, USA

<sup>3</sup>Druckenmiller Center for Lung Cancer Research, Memorial Sloan Kettering Cancer Center, New York, NY, USA

<sup>4</sup>Parker Institute for Cancer Immunotherapy, Memorial Sloan Kettering Cancer Center, New York, NY, USA

<sup>5</sup>Department of Genetics and Genomic Sciences, Icahn School of Medicine at Mount Sinai, New York, NY, USA

<sup>6</sup>Department of Immunology, H. Lee Moffitt Cancer Center and Research Institute, Tampa, FL, USA

<sup>7</sup>Human Oncology and Pathogenesis Program, Memorial Sloan Kettering Cancer Center, New York, NY, USA

<sup>8</sup>Marie-Josée and Henry R. Kravis Center for Molecular Oncology, Memorial Sloan Kettering Cancer Center, New York, NY, USA

<sup>9</sup>Department of Biostatistics and Epidemiology, Memorial Sloan Kettering Cancer Center, New York, NY, USA

<sup>10</sup>Ludwig Collaborative Laboratory, Memorial Sloan Kettering Cancer Center, New York, NY, USA

<sup>11</sup>Department of Pathology, Memorial Sloan Kettering Cancer Center, New York, NY, USA

<sup>12</sup>Bristol Myers Squibb, Princeton, NJ, USA

<sup>13</sup>Fox Chase Cancer Center, Philadelphia, PA, USA

<sup>14</sup>Cancer Research UK Lung Cancer Centre of Excellence, University College London Cancer Institute, London, UK

<sup>15</sup>Translational Cancer Therapeutics Laboratory, Francis Crick Institute, London, UK

<sup>16</sup>Department of Microbiology and Immunology, Medical University of South Carolina, Charleston, SC, USA

<sup>17</sup>Lead Contact

\*Correspondence: [hellmanm@mskcc.org](mailto:hellmanm@mskcc.org)

<https://doi.org/10.1016/j.ccell.2018.03.018>

## SUMMARY

Combination immune checkpoint blockade has demonstrated promising benefit in lung cancer, but predictors of response to combination therapy are unknown. Using whole-exome sequencing to examine non-small-cell lung cancer (NSCLC) treated with PD-1 plus CTLA-4 blockade, we found that high tumor mutation burden (TMB) predicted improved objective response, durable benefit, and progression-free survival. TMB was independent of PD-L1 expression and the strongest feature associated with efficacy in multivariable analysis. The low response rate in TMB low NSCLCs demonstrates that combination immunotherapy does not overcome the negative predictive impact of low TMB. This study demonstrates the association between TMB and benefit to combination immunotherapy in NSCLC. TMB should be incorporated in future trials examining PD-(L)1 with CTLA-4 blockade in NSCLC.

## INTRODUCTION

T cell checkpoint inhibitors have improved the survival of patients with a multitude of advanced malignancies. Antibodies targeting

programmed cell death receptor-1 (PD-1) or its ligand (PD-L1) are now approved for treating multiple cancers, including non-small-cell lung cancer (NSCLC) (Borghaei et al., 2015; Reck et al., 2016). Responses to anti-PD-(L)1 monotherapies have the

### Significance

Our study examines the molecular features associated with response in patients with NSCLC treated with the combination of PD-1 plus CTLA-4 blockade. Contrary to our initial hypothesis, tumor mutation burden is the strongest feature associated with benefit. Combination immunotherapy may be particularly effective in those with high TMB but is insufficient to overcome the negative predictive impact of low mutation burden. This report highlights the critical importance of tumor mutation burden as a predictive marker and provides insight into the determinants of response in those treated with combination immune checkpoint blockade therapy.

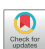

**Table 1. Baseline Clinical Characteristics**

| Patient Characteristics<br>(n = 75) | All Patients | TMB Low    | TMB High   | p Value             |
|-------------------------------------|--------------|------------|------------|---------------------|
|                                     | No. (%)      | No. (%)    | No. (%)    |                     |
| Age (years), median<br>(range)      | 66 (42–87)   | 66 (43–85) | 65 (42–87) | 0.7739              |
| Gender                              |              |            |            |                     |
| Male                                | 37 (49)      | 17 (45)    | 20 (54)    | 0.4916              |
| Female                              | 38 (51)      | 21 (55)    | 17 (46)    |                     |
| Histology                           |              |            |            |                     |
| Non-squamous                        | 59 (79)      | 31 (82)    | 28 (76)    | 0.5829              |
| Squamous                            | 16 (21)      | 7 (18)     | 9 (24)     |                     |
| Smoking status                      |              |            |            |                     |
| Current/former                      | 60 (80)      | 24 (63)    | 36 (97)    | <b>0.0003</b>       |
| Never                               | 15 (20)      | 14 (37)    | 1 (3)      |                     |
| Stage                               |              |            |            |                     |
| IIIB                                | 9 (12)       | 6 (16)     | 3 (8)      | 0.4799              |
| IV                                  | 66 (88)      | 32 (84)    | 34 (92)    |                     |
| Performance status                  |              |            |            |                     |
| ECOG 0                              | 30 (40)      | 16 (42)    | 14 (38)    | 0.8147              |
| ECOG 1                              | 45 (60)      | 22 (58)    | 23 (62)    |                     |
| PD-L1 expression                    |              |            |            |                     |
| 0%                                  | 25 (33)      | 13 (34)    | 12 (32)    | 0.8037 <sup>a</sup> |
| ≥ 1%                                | 45 (60)      | 21 (55)    | 24 (65)    |                     |
| Unknown                             | 5 (7)        | 4 (11)     | 1 (3)      |                     |
| Best overall response               |              |            |            |                     |
| Complete/partial<br>response        | 24 (32)      | 5 (13)     | 19 (51)    | <b>0.0018</b>       |
| Stable disease                      | 27 (36)      | 17 (45)    | 10 (27)    |                     |
| Progression/not<br>evaluable        | 24 (32)      | 16 (42)    | 8 (22)     |                     |
| Clinical benefit                    |              |            |            |                     |
| Durable clinical<br>benefit (DCB)   | 37 (49)      | 13 (34)    | 24 (65)    | <b>0.0111</b>       |
| No durable benefit<br>(NDB)         | 38 (51)      | 25 (66)    | 13 (35)    |                     |

p values in bold type represent significance <0.05. See also [Figure S1](#) and [Tables S1](#) and [S2](#).

<sup>a</sup>Reflects comparison of PD-L1 0% versus ≥ 1%.

potential for remarkable durability, but occur in only a minority of patients. This experience highlights two primary opportunities for continued progress: identification of predictive biomarkers of response and development of combinatorial treatment approaches that improve the frequency, depth, and duration of response.

Toward identification of predictors of response to anti-PD-(L)1 monotherapy, tumor expression of PD-L1 has been a primary focus. However, the sensitivity and specificity of PD-L1 expression is modest ([Reck et al., 2016](#); [Taube et al., 2014](#)), which has prompted the search for additional predictive tools. Our group and others have identified an association between increased nonsynonymous tumor mutation burden (TMB) and response in patients with melanoma treated with CTLA-4 blockade ([Snyder et al., 2014](#); [Van Allen et al., 2015](#)), NSCLCs treated with PD-1 blockade ([Carbone et al., 2017](#); [Rizvi et al., 2015](#); [Rizvi](#)

[et al., 2018](#)), mismatch repair deficient tumors treated with PD-1 blockade ([Le et al., 2017](#)), and bladder cancers treated with PD-L1 blockade ([Rosenberg et al., 2016](#)).

In parallel to these correlative efforts, multiple ongoing clinical trials are attempting to improve response rates by combining immunotherapies. Pre-clinical ([Wei et al., 2017](#)) and clinical ([Hammers et al., 2017](#); [Hellmann et al., 2017](#); [Wolchok et al., 2017](#)) studies have identified non-redundant effects of CTLA-4 and PD-1 signaling and synergistic anti-tumor responses ([Curran et al., 2010](#)). To date, the genomic determinants of response to combination immunotherapy have not been defined.

We sought to examine the molecular features correlated with response in patients with NSCLC treated with combination immunotherapy. In particular, we focused on whether TMB would correlate with response, as it has in patients treated with PD-1 monotherapy, or if combination therapy may broaden the repertoire of effective anti-tumor immunity and thereby diminish the importance of TMB.

## RESULTS

### Genomic and Clinical Characteristics of Study Cohort Are Generalizable

We performed whole-exome sequencing (WES) on tumor tissue and paired blood ([Van Allen et al., 2014](#)) collected from 75 patients with NSCLC treated with nivolumab plus ipilimumab as part of the CheckMate-012 study ([Hellmann et al., 2017](#)) ([Table 1](#)). The clinical features and efficacy outcomes in the cohort of patients examined with WES were similar to the overall set of patients enrolled in CheckMate-012 ([Figure S1](#); [Tables S1](#) and [S2](#)). The mean target coverage was 148X (interquartile range [IQR] 116–182X) in tumors and 81X (IQR 70–98X) in normal; 94% of target sequences were sequenced to at least 20X depth in tumors ([Table S3](#)). Sequencing coverage was similar between responders and non-responders ([Figure S2A](#)). TMB was defined as total number of nonsynonymous single nucleotide and indel variants ([Table S3](#)). Except for expected differences by smoking status, baseline clinical variables were similar between those with TMB above versus below median ([Table 1](#)).

The median and distribution of TMB and transition/transversion ratio in this study were similar to NSCLC tumors sequenced as part of The Cancer Genome Atlas (TCGA) ([Campbell et al., 2016](#)) ([Figure S2B](#) and [Table S3](#)).

### Tumor Mutation Burden Is Significantly Associated with Improved Efficacy of Combination Immunotherapy

TMB was higher in patients with objective response (complete or partial response) compared with those with no response (stable or progressive disease) (median TMB 273 versus 114 mutations, Mann-Whitney  $p = 0.0004$ , [Figure 1A](#)). Similar results were seen when comparing patients with durable clinical benefit (DCB; partial or stable response for >6 months) with those with no durable benefit (NDB) (median TMB 210 versus 113, Mann-Whitney  $p = 0.0071$ ). Objective response rate, DCB rate, and progression-free survival (PFS) were all greater in patients with high TMB (>median, 158 mutations) compared with low TMB ( $\leq$  median) (overall response rate [ORR] 51% versus 13%, Fisher's exact  $p = 0.0005$ ; DCB 65% versus 34%, Fisher's exact  $p = 0.011$ ; PFS hazard ratio = 0.41, log rank  $p = 0.0024$ ) ([Figures 1B](#) and

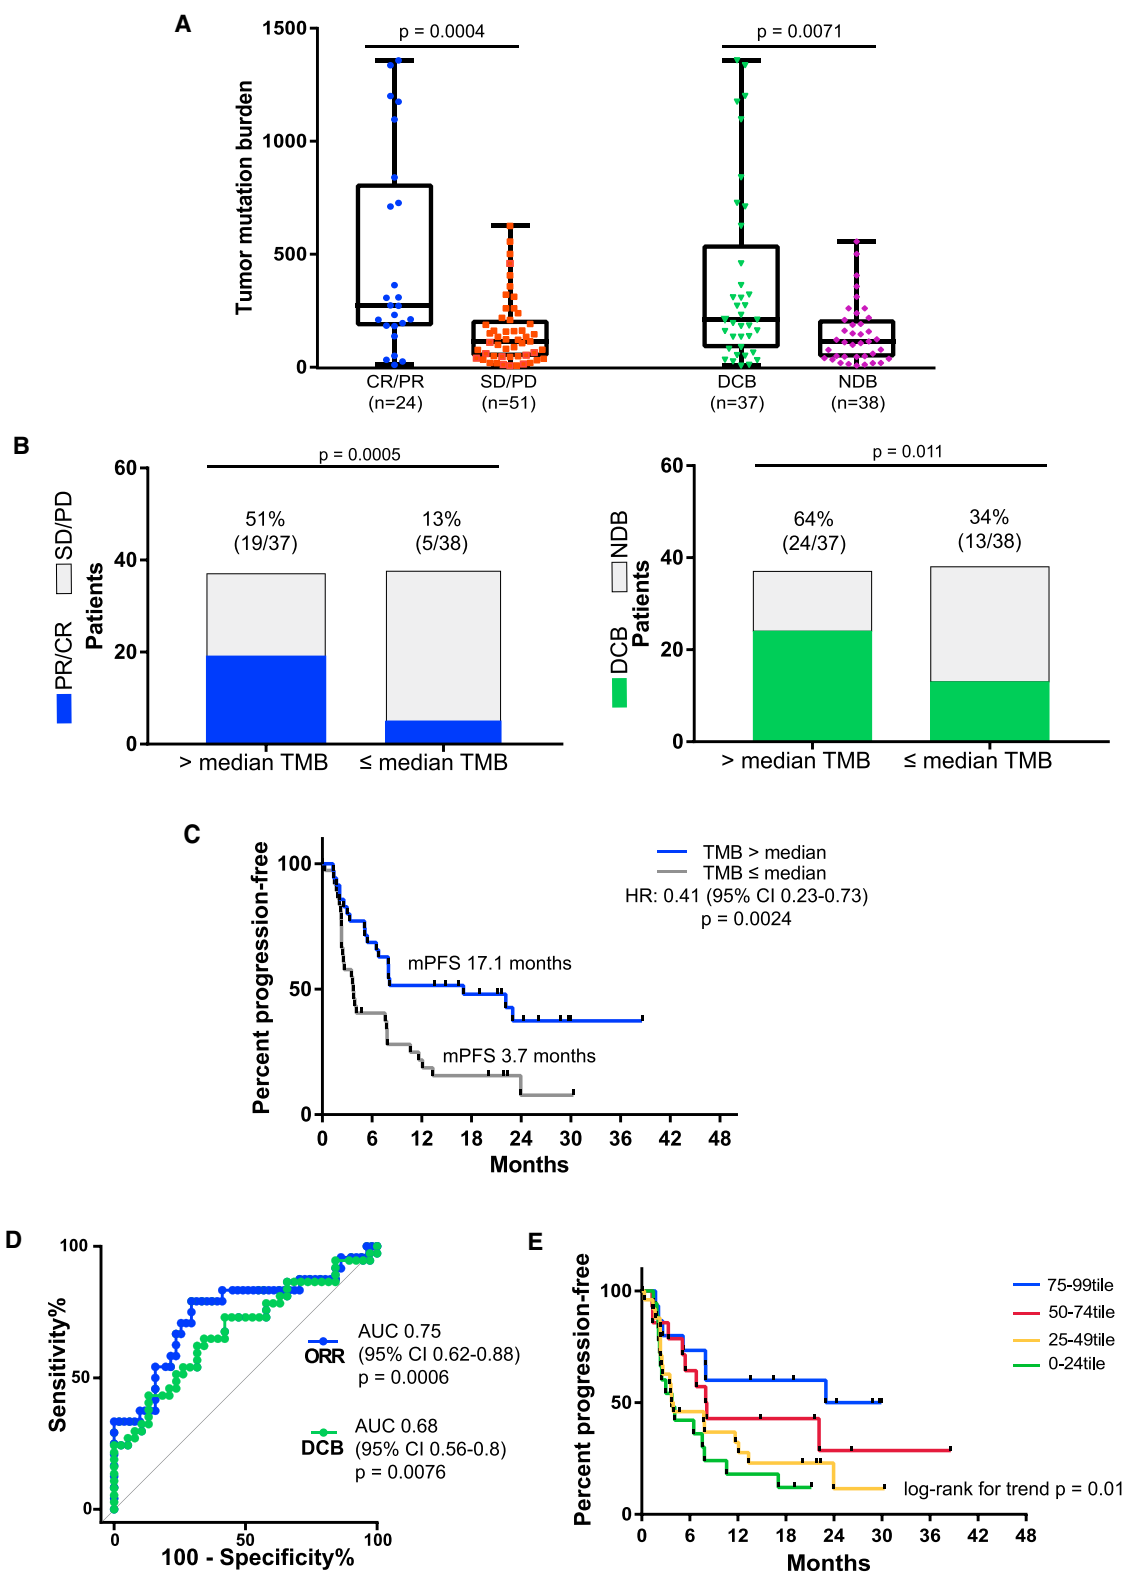

**Figure 1. TMB Correlates with Efficacy in Patients with NSCLC Treated with Nivolumab Plus Ipilimumab**

(A) TMB in patients with complete response (CR)/partial response (PR) (n = 24, blue) versus stable disease (SD)/progressive disease (PD) (n = 51, red) (median 273 versus 114 mutations, Mann-Whitney  $p = 0.0004$ ) and TMB in patients with DCB (green, n = 37) versus those with NDB (purple, n = 38) (median 210 versus 113 mutations, Mann-Whitney  $p = 0.0071$ ). Medians, interquartile ranges, and minimum/maximum shown in boxplots.

(legend continued on next page)

1C). There was a strong association between increased TMB and increased rate of ORR or DCB (ORR area under the curve [AUC] 0.75,  $p = 0.0006$ , DCB AUC 0.68,  $p = 0.0076$ ) (Figure 1D).

To contextualize this dataset and facilitate generalizability, we also characterized TMB in this cohort as a percentile rank of NSCLCs profiled by TCGA. Serial increases in percentile threshold were associated with improved PFS (Figure 1E). Patients with tumors in either the upper half or upper tertile of TMB had significantly improved ORR and PFS (Figures S2C and S2D).

### Computationally Predicted Neoantigen Burden and Mutation Burden Are Closely Correlated

Consistent with previous reports (Rizvi et al., 2015) and potentially indicative of the mechanistic importance of neoantigens generated from somatic nonsynonymous mutations (Schumacher and Schreiber, 2015), TMB (defined as nonsynonymous variants) was more strongly associated with ORR and PFS than mutation burden inclusive of silent variants (Figure S2E). However, computationally predicted candidate neoantigen burden (Nathanson et al., 2017) (Table S3) was not more predictive than TMB of clinical benefit when using either a moderate or strong threshold (500 nM or 50 nM) of neoantigen binding affinity to patient-specific class I HLA alleles (Figure S2F). Clonal predicted neoantigen burden was more predictive of improved PFS compared with total predicted neoantigen burden ( $>$  versus  $\leq$  median predicted clonal neoantigens, log rank  $p = 0.04$ ;  $>$  versus  $\leq$  median total predicted neoantigens versus  $p = 0.07$ ). TMB and computationally predicted neoantigen burden were highly correlated (Spearman  $\rho$  0.92,  $p < 0.0001$ ; Figure S2G), consistent with this characteristically proportional relationship (Rooney et al., 2015; Van Allen et al., 2015). There were no clear associations between specific HLA alleles and objective response (Figure S2H).

### Individual Genes and Additional Molecular Features Associated with Response or Resistance to Combination Immunotherapy

We next explored other molecular features that may refine the association of TMB with response to combination immunotherapy (Figure 2). Pre-clinical (Burr et al., 2017; Manguso et al., 2017; Mezzadra et al., 2017; Patel et al., 2017; Skoulidis et al., 2015) and clinical reports (Gao et al., 2016; George et al., 2017; Zaretsky et al., 2016) have described associations between individual altered genes and response or resistance to immune checkpoint blockade (Table S4). Relatively few of these genes were found in this dataset (Figure 2), but some genes were exclusively associated with resistance in our series, such as *STK11* (zero responses in seven patients with *STK11* mutations) and *PTEN* (0 of 4), consistent with previous reports, although not reaching statistical significance likely owing to small numbers (Table S4). *IFNGR1* mutations ( $n = 3$ ) were found

only in responders. To identify other potential genes of interest, we identified significantly recurrent genes using MutSigCV (Lawrence et al., 2013) (Table S4). Of these genes, only *TP53* mutations were enriched in responders (odds ratio 2.9, Fisher's exact  $p = 0.048$ , Figures S3A and S3B). Notably, *TP53* mutations were also associated with increased mutation burden in both the cohort of combination immunotherapy NSCLCs and TCGA NSCLCs (Figures S3C–S3F and Table S4).

Additionally, to explore the applicability of targeted next-generation sequencing as an estimate of exonic mutation burden (Chalmers et al., 2017; Zehir et al., 2017), we found that limiting variants to the 468 genes represented in our institutional MSK-IMPACT panel (Zehir et al., 2017) or the 315 genes in the FoundationOne panel (Frampton et al., 2013) maintained similar predictive fidelity for efficacy (Figures S3G–S3H).

### Tumor Mutation Burden Is Independent of PD-L1 and Remains Significantly Associated with Efficacy in Multivariable Analysis

Lastly, we examined the impact of mutation burden on response in the context of tumor PD-L1 expression, which was known in 70 of 75 patients (93%). There was no correlation between PD-L1 expression and TMB (Spearman  $\rho -0.087$ ,  $p = 0.48$ ; Figure 3A). The distribution of TMB was similar in those with PD-L1 positive versus PD-L1 negative tumors (median 162 versus 135, Mann-Whitney  $p = 0.89$ ). In multivariable analysis incorporating PD-L1 expression, histology, smoking status, performance status, and tumor burden, TMB was independently associated with ORR ( $p = 0.001$ , Figure 3B) and PFS ( $p = 0.002$ , Figures 3C and S4A). When considered in composite, patients with positive PD-L1 expression (defined as  $\geq 1\%$  expression) and high TMB (defined as  $>$  median) had significantly improved rates of ORR and PFS compared with those tumors with only one or neither variable (ORR chi-square for trend  $p < 0.0001$ , Figure 3D; PFS log rank for trend  $p = 0.0072$ , Figure S4B). Of particular note, four of five responders whose tumors were PD-L1 negative had high mutation burden (absolute mutation burden range 307–1175, TCGA percentile rank 72–98<sup>th</sup>-tile), including one with a pathologically confirmed complete response (Figure S4C).

## DISCUSSION

In patients with advanced cancers treated with PD-1 blockade monotherapy, multiple reports across multiple tumor types (Carbone et al., 2017; Le et al., 2017; Rizvi et al., 2015; Rosenberg et al., 2016; Snyder et al., 2014; Van Allen et al., 2015) have identified an association between increased TMB and increased likelihood of disease control. However, prior to this report, the significance of TMB for predicting response to combination immunotherapy in NSCLC was not known. In fact, we

(B) Objective response and durable clinical benefit in patients with high TMB ( $>$ median, 158 mutations) versus low TMB ( $\leq$ median) (ORR 51% versus 13%, odds ratio 6.97 [95% confidence interval (CI) 2.19–19.0], Fisher's exact  $p = 0.0005$ ; DCB 65% versus 34%, odds ratio 3.55 [95% CI 1.3–8.64], Fisher's exact  $p = 0.011$ ). Proportion of CR/PR or DCB, respectively, are colored on histograms with rate (n/N) shown above each bar.

(C) PFS in patients with high TMB versus low TMB (median 17.1 versus 3.7 months, Mantel-Haenszel hazard ratio 0.41 [95% CI 0.23–0.73], log rank  $p = 0.0024$ ).

(D) Receiver operating characteristic (ROC) curves for correlation of TMB with objective response (CR/PR; blue line) (AUC 0.75 [95% CI 0.62–0.88],  $p = 0.0006$ ) and DCB (green line) (AUC 0.68 [95% CI 0.56–0.8],  $p = 0.0076$ ).

(E) PFS in cohorts of patients defined by quartiles of TMB percentile rank among NSCLC tumors profiled by TCGA (log rank for trend  $p = 0.01$ ).

See also Figure S2 and Table S3.

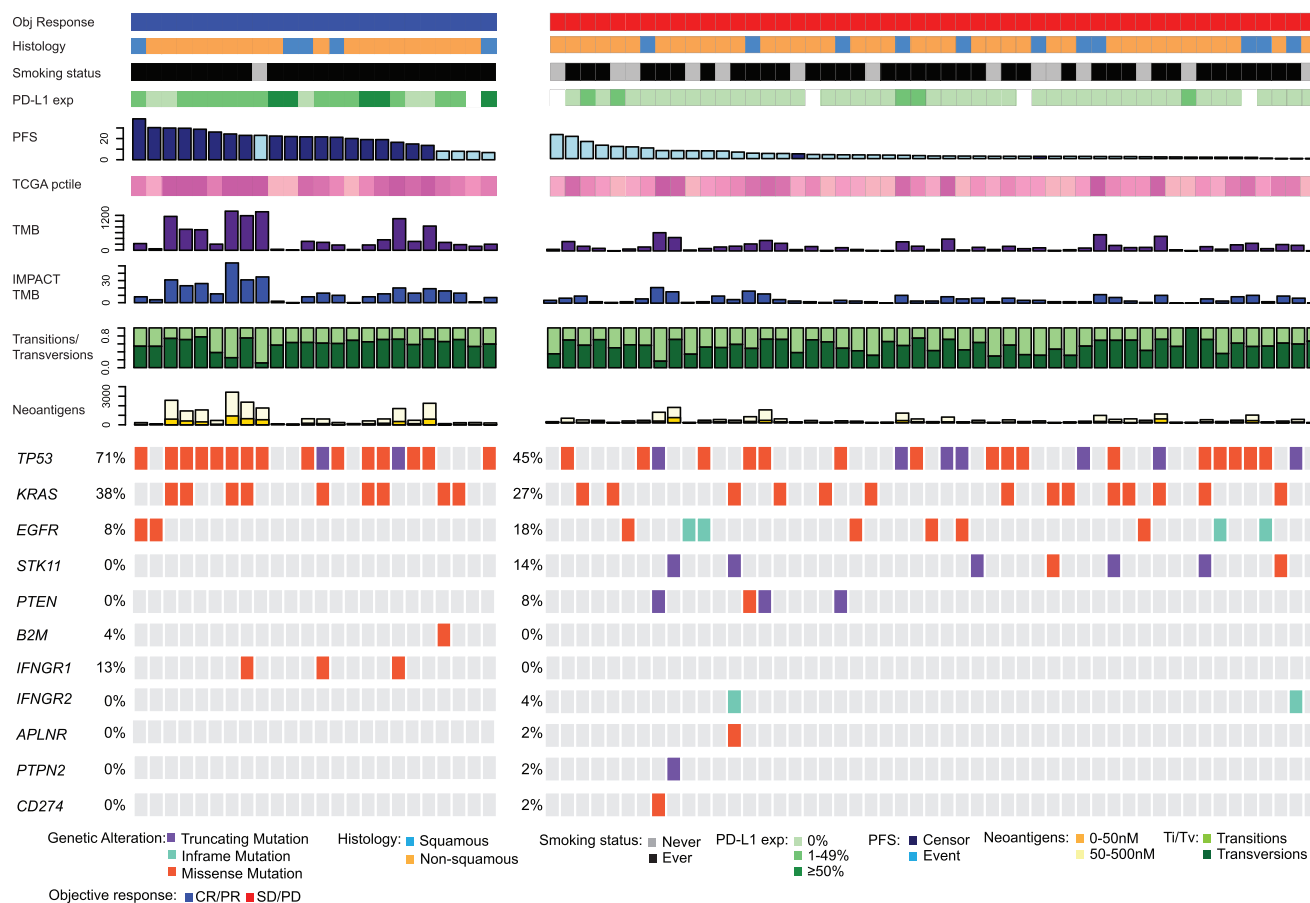

**Figure 2. Summary of Clinical and Molecular Features Associated with Response or Non-response in Patients with NSCLC Treated with Nivolumab Plus Ipilimumab**

Individual patients are represented in each column, organized by those with objective response on the left (blue) and those with no objective response on the right (red). Categories of histology (squamous or non-squamous) and smoking status (never or ever) are characterized. PD-L1 expression is stratified as 0%, 1%–49%, or  $\geq 50\%$ . PFS is shown in months, with the color of each bar representing those who are censored (dark blue) or have progressed (light blue). The NSCLC TCGA percentile rank for each case is described from 0% to 100% in light to dark purple. Nonsynonymous TMB and mutation burden quantified using genes including in the MSK-IMPACT targeted next-generation sequencing panel are shown in histograms. The percent of transitions (light green) and transversions (dark green) are shown. Candidate neoantigen burden is quantified in histograms, stratified by predicted patient-specific HLA binding affinity 0–50 nM (orange) or 50–500 nM (light yellow). The occurrences of selected genes in each case are represented in the oncoprint, with the percent frequency in responders or non-responders shown. See also [Figures S2](#) and [S3](#); [Tables S3](#) and [S4](#).

initially hypothesized that TMB in patients with NSCLCs would not impact response to PD-1 plus CTLA-4 blockade therapy. In an analogous scenario, the impact of PD-L1 expression is abated in patients with melanoma treated with PD-1 plus CTLA-4 blockade ([Wolchok et al., 2017](#)), and in a report of 17 patients with melanoma treated with combination immunotherapy, TMB did not correlate with response ([Goodman et al., 2017](#)). In contrast, we found that TMB is the strongest predictor of efficacy identified in our dataset of patients with NSCLC. Similar results were seen in a recent report of patients with small cell lung cancer treated with PD-1 plus CTLA-4 blockade ([Hellmann et al., 2018](#)), suggesting the importance of TMB as biomarker for combination immunotherapy across lung cancers.

Given the correlation between TMB and efficacy, it is tantalizing to consider how TMB may be applied prospectively as a biomarker. One criticism of determining TMB by WES, as we have in this study, is that WES is currently challenging to perform

in an expeditious time frame and at adequate scale needed for general use in patients with advanced NSCLC. Emerging independent sets of data have demonstrated that targeted next-generation sequencing (NGS) panels, which are already being used routinely in clinic, may provide a reasonable estimate of exonic mutation burden ([Chalmers et al., 2017](#); [Rizvi et al., 2018](#); [Zehir et al., 2017](#)). We found that estimated TMB using only genes covered in US Food and Drug Administration-approved targeted NGS panels MSK-IMPACT ([Zehir et al., 2017](#)) and FoundationOne ([Frampton et al., 2013](#)) were similarly predictive to the TMB derived from WES. These currently available assays may provide a practical platform for clinical practice now. Furthermore, although the technology is still being optimized, use of cell-free DNA in plasma to estimate TMB has recently been shown to be feasible and, when detectable, to correlate with TMB estimated from tumor tissue ([Fabrizio et al., 2017](#); [Gandara et al., 2017](#)).

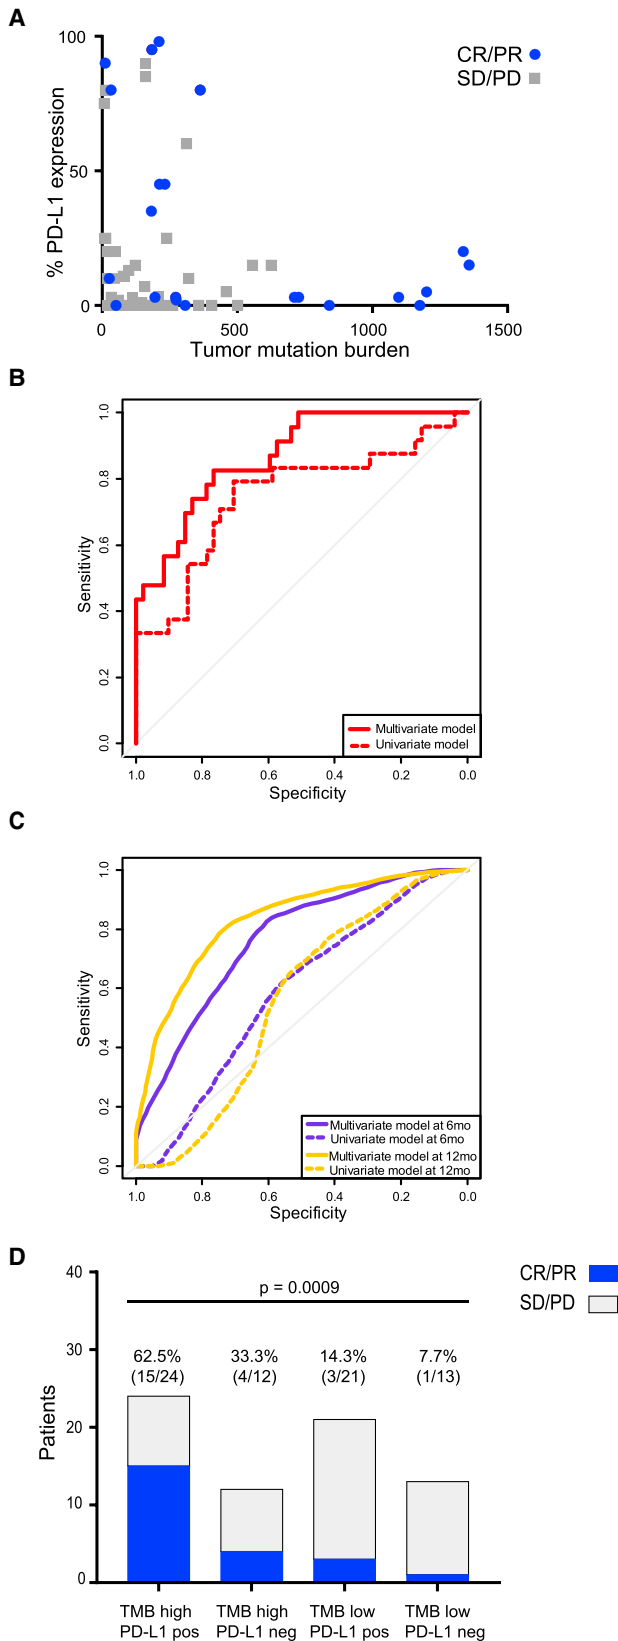

**Figure 3. Association between TMB and Efficacy in Multivariate Context**

(A) Correlation between TMB and PD-L1 expression (Spearman  $\rho$   $-0.087$  [95% CI  $-0.32$  to  $0.16$ ],  $p = 0.48$ ). Patients with CR/PR ( $n = 24$ ) are colored in blue circles; those with SD/PD ( $n = 51$ ) are colored in gray squares.

(B) ROC curves for multivariate model correlation with objective response (CR/PR), with model including TMB (continuous variable), PD-L1 (continuous), histology (binary, squamous versus non-squamous), smoking status (binary, ever versus never), performance status (Eastern Cooperative Oncology Group [ECOG] 0 versus 1), and tumor burden (binary, > versus ≤ median) (plain line, AUC 0.869). Univariate correlation of TMB with objective response is shown again for reference (dotted line).

(C) ROC curves for univariate correlation of TMB (continuous) with progression-free survival (dotted line) at 6 months (purple, AUC = 0.585) or 12 months (yellow, AUC = 0.558). ROC curves for multivariate correlation of model including TMB (continuous), PD-L1 (continuous), histology (squamous versus non-squamous), smoking status (ever versus never), performance status (ECOG 0 versus 1), and tumor burden (binary, > versus ≤ median) also shown (plain lines; at 6 months AUC = 0.764, at 12 months AUC = 0.831).

(D) Histogram of objective response (CR/PR) to nivolumab plus ipilimumab in patients characterized by high mutation burden (>median TMB) and PD-L1 expression ( $\geq 1\%$ ), high mutation burden or PD-L1 expression, or neither. Response rates (n/N) are shown above each bar, with proportion of those with PR/CR colored in blue. Chi-square for trend  $p < 0.0001$ . See also Figure S4.

The mechanism(s) underlying the association between TMB and benefit with immunotherapy is not entirely clear. A leading hypothesis suggests that neoantigens, tumor-specific non-self peptides resulting from somatic nonsynonymous mutations, represent the mechanistic link. Several pre-clinical and clinical reports have described neoantigen-specific T cell responses that direct anti-tumor immunity (Gubin et al., 2014; Hadrup et al., 2009; McGranahan et al., 2016; Tran et al., 2015; van Rooij et al., 2013). Neoantigen-specific T cell responses appear to be few in numbers for any given patient, such that increased TMB may associate with increased benefit by increasing the chance for an effective neoantigen to be generated and presented. The decreased predictive strength of total, rather than nonsynonymous, TMB on efficacy found in our study supports this hypothesis by emphasizing the particular importance of nonsynonymous variants. However, the capacity to computationally predict neoantigens from exome sequences remains incomplete. In this study, similar to others, predicted neoantigen burden was largely proportional to mutation burden and did not appear to have distinct predictive power. In one study (Van Allen et al., 2015), shuffling of HLAs such that neoantigen predictions were no longer based on patient-specific HLA alleles had no impact on the association of neoantigen burden and benefit. These data suggest that current routine neoantigen prediction algorithms based on predicted peptide-HLA binding affinity alone are inadequate. Future work to incorporate more nuanced understanding of neoantigen clonality (McGranahan et al., 2016), fitness (Luksza et al., 2017), and interactions with T cell receptor binding (Glanville et al., 2017) are critical, especially as personalized vaccine strategies targeting tumor-specific predicted neoantigens are now under way in the clinic (Ott et al., 2017; Sahin et al., 2017).

Although TMB was the strongest feature associated with efficacy in this study, it remains an unrefined metric. Further refinement in understanding the molecular determinants of response to immunotherapy will likely come from identification of key somatic variants that mediate response or resistance to

immunotherapy. Recent case reports of acquired resistance (Anagnostou et al., 2017; Zaretsky et al., 2016) and pre-clinical reports using CRISPR/Cas9 screening (Burr et al., 2017; Manguso et al., 2017; Patel et al., 2017) have begun to elucidate genes in both tumors and T cells that are critical to response or resistance to immunotherapy. However, mutations in each of these individual genes appear to be relatively uncommon at least in pre-treatment tissue; selective pressure from immunotherapy at acquired resistance may reveal a distinct genomic landscape. Among recurrent genes in our cohort, *TP53* was modestly associated with increased response but even more strongly associated with increased TMB. The association between *TP53* alterations and TMB was also seen in a recent report of TCGA lung adenocarcinoma data (Dong et al., 2017), and is perhaps expected given the function of *TP53* (Levine and Oren, 2009) and its known association with smoking (Pfeifer et al., 2002). *STK11* was exclusively associated with resistance, which aligns with previous reports describing the T cell excluded phenotype associated with these variants (Skoulidis et al., 2015), but did not reach statistical significance. Studies of larger size will ultimately be critical to define the landscape and frequency of “immunologic drivers” in NSCLC and other cancers.

In addition to refining the genomic features that associate with response and resistance to immune checkpoint blockade, a combination of assays may be helpful to predict outcomes with greater sensitivity and specificity. Here, similar to patients with NSCLC treated with PD-1 monotherapy, we found that efficacy was enhanced in those characterized by both high TMB and PD-L1 positivity. Considering both variables together begins to explain patients who may otherwise be considered curious exceptions (e.g., PD-L1 negative responders who have high TMB) and further improves predictive accuracy using the composite of TMB and PD-L1. The incorporation of assays, such as peripheral T cell phenotyping, T cell receptor sequencing, multiplex pathology imaging, bulk and single-cell gene expression profiling, may provide additional biological insight and clinical predictive power in the future.

We did not identify distinct molecular features of response to combination immunotherapy relative to what has been described in patients with NSCLC treated with PD-1 blockade monotherapy. It remains uncertain how PD-1 plus CTLA-4 blockade may improve response rates compared with PD-1 blockade monotherapy. Given the magnitude of benefit in patients with TMB high tumors, we speculate that response among patients with TMB high tumors is further improved with combination therapy and/or there is a modest heightening of the slope associating TMB and benefit relative to PD-1 blockade monotherapy. Important questions remain about the mechanisms of underlying benefit of combination CTLA-4 plus PD-1 blockade and how these therapies synergize in the context of high TMB. In our report, the persistently low response rate in patients who were TMB low/PD-L1 negative demonstrates that combination therapy does not overcome the barriers to response in those patients who are least likely to respond to PD-1 blockade.

Other limitations of this study include its retrospective nature, such that tissue was not available for all patients treated on this clinical trial and there was insufficient tissue to perform additional expression analysis. Importantly, however, the clinical characteristics and outcomes in the cohort analyzed here were similar to the overall group of patients treated with nivolumab plus ipilimumab on CheckMate-012.

In summary, we demonstrate that TMB strongly predicted efficacy in patients with NSCLC treated with combination PD-1 plus CTLA-4 blockade. TMB is independent of other clinicopathologic features, including PD-L1 expression. Based in part on these data, an assessment of TMB has been incorporated in a Phase III trial examining the benefit of PD-1 plus CTLA-4 blockade (CheckMate227).

## STAR★METHODS

Detailed methods are provided in the online version of this paper and include the following:

- KEY RESOURCES TABLE
- CONTACT FOR REAGENT AND RESOURCE SHARING
- EXPERIMENTAL MODEL AND SUBJECT DETAILS
  - Combination Immunotherapy Treated Patients
  - Clinical Efficacy Analyses
  - Tumor and Germline Samples
- METHOD DETAILS
  - Whole Exome Capture and Sequencing
  - Exome Alignment and Assembly
  - Sequencing Quality Control
  - Variant Calling
  - Mutation Burden Quantification
  - Mutation Burden Percentile Rank Compared to NSCLC Tumors Sequenced by TCGA
  - HLA Analysis
  - In Silico Neoantigen Prediction Pipeline
  - Predicted Neoantigen Clonality
  - Recurrently Altered Genes
- QUANTIFICATION AND STATISTICAL ANALYSES
- DATA AND SOFTWARE AVAILABILITY

## SUPPLEMENTAL INFORMATION

Supplemental Information includes four figures and four tables and can be found with this article online at <https://doi.org/10.1016/j.ccell.2018.03.018>.

## ACKNOWLEDGMENTS

This work was supported by The Conquer Cancer Foundation of ASCO Career Development Award, Bristol-Myers Squibb International Immuno-Oncology Network (II-ON), Geoffrey Beene Cancer Research Center, the Ludwig Trust, Memorial Sloan Kettering Cancer Center (MSKCC) Support Grant/Core Grant (P30 CA008748), Parker Institute for Cancer Immunotherapy, Druckenmiller Center for Lung Cancer Research at MSKCC, Swim Across America, and Stand Up to Cancer-American Cancer Society Lung Cancer Dream Team Translational Research Grant (SU2C-AACR-DT17-15). Stand Up to Cancer is a program of the Entertainment Industry Foundation. Research grants are administered by the American Association for Cancer Research, the scientific partner of SU2C. M.D.H., M.K.C., T.M., and J.D.W. are members of the Parker Institute for Cancer Immunotherapy. Any opinions, findings, and conclusions expressed in this material are those of the author(s) and do not necessarily reflect those of the American Society of Clinical Oncology or the Conquer Cancer Foundation.

## AUTHOR CONTRIBUTIONS

Conceptualization, M.D.H., A.S., and J.D.W.; Methodology, M.D.H., T.N., A.A., N.McG., C.S., A.S., and J.D.W.; Software, T.N., A.A., J.B.N., and E.C.; Formal analysis, M.D.H., T.N., N.R., F.S.-V., A.A., A.N., J.B.N., and N.McG.;



Investigation, M.D.H., T.N., N.R., A.A., L.M.B.M., M.A.-A., C.L., J.L.S., M.K.C., J.E.C., M.H.V., M.T., and C.M.R.; Resources, M.D.H., B.C.C., X.-M.L., K.C., A.R., P.V., W.J.G., H.B., S.J.A., N.McG., C.S., J.H., and T.M.; Data Curation, M.D.H., T.N., H.R., B.C.C., M.T., X.-M.L., A.R., P.V., W.J.G., H.B., and S.J.A.; Writing – Original Draft, M.D.H., A.S., and J.D.W.; Writing – Review and Editing, all authors; Visualization, M.D.H., T.N., H.R., and F.S.V.; Supervision, M.D.H., C.M.R., J.H., T.M., and J.D.W.; Project Administration, M.D.H.; Funding Acquisition, M.D.H.

#### DECLARATION OF INTERESTS

M.D.H. reports paid consultancy from Bristol-Myers Squibb, Merck, Genentech, AstraZeneca/MedImmune, Novartis, Janssen, Mirati Therapeutics, and Shattuck Labs; research funding from Bristol-Myers Squibb; and a patent filed by MSK related to the use of tumor mutation burden to predict response to immunotherapy (PCT/US2015/062208). B.C.C. reports paid consultancy from Abbvie and speaker's bureau fees from AstraZeneca LLC, Roche/Genentech, Bristol-Myers Squibb, and Takeda. J.L.S. reports stock or other ownership of Merck, Chemed Corporation, and Thermo Fisher Scientific. M.K.C. reports grants from and employment of a family member by Bristol-Myers Squibb; and personal fees for advisory board participation from AstraZeneca and Incyte. J.E.C. reports paid consultancy from Genentech/Roche, AstraZeneca/MedImmune, Merck, and Bristol-Myers Squibb; research funding from Genentech/Roche, Bristol-Myers Squibb, and AstraZeneca/MedImmune; and honoraria from AstraZeneca/MedImmune. M.H.V. reports paid consultancy from Eisai, Calithera, Corvus, Alexion, Exelixis, Novartis, and Pfizer; and research funding from Roche/Genentech and Bristol-Myers Squibb. X.-M.L., K.C., A.R., P.V., and W.J.G. report employment at Bristol-Myers Squibb. H.B. reports paid consultancy from Bristol-Myers Squibb, Merck, Eli Lilly, Celgene, Germab, Genentech, Boehringer Ingelheim, and AstraZeneca; research funding from Millennium Pharmaceuticals, Bristol-Myers Squibb, Eli Lilly, Merck, and Celgene; and travel, accommodations, or expenses from Bristol-Myers Squibb, Eli Lilly, Celgene, Genentech, and AstraZeneca. C.M.R. reports paid consultancy from Merck, Bristol-Myers Squibb, Genentech/Roche, AstraZeneca, Elucida, and Harpoon; and research funding from Biomarin. S.J.A. reports stock or other ownership from Cellular Biomedicine Group, honoraria, consulting or advisory role, travel, accommodations, and expenses from AstraZeneca, Boehringer Ingelheim, Bristol-Myers Squibb, and Merck. C.S. reports paid consultancy from Boehringer Ingelheim, Eli Lilly, Novartis, and Roche; speaker fees from Celgene, GlaxoSmithKline, Pfizer, and Servier; ownership interest in Achilles Therapeutics, Apogen Biotechnologies, Epic Biosciences, and GRAIL; patents for immune checkpoint intervention in cancer (PCT/EP2016/071471), a method of detecting tumor recurrence (1618485.5), and a method for treating cancer (PCT/EP2016/059401); and is a consult/advisory board member for Apogen, Epic Biosciences, and GRAIL. J.H. reports research funding from Neon Therapeutics. N.M. reports personal fees from Achilles Therapeutics; and patents for immune checkpoint intervention in cancer (PCT/EP2016/071471) and a method for treating cancer (PCT/EP2016/059401). A.S. reports employment at Adaptive Biotechnologies; honorarium from Genentech; prior research funding from BMS; and paid consultancy from Driver. J.D.W. reports stock or other ownership of Potenza Therapeutics, Tizona Therapeutics Inc, Seramatrix Corp, Adaptive Biotechnologies, Trieza Therapeutics, and Beigene; paid consultancy from Bristol-Myers Squibb, Merck, MedImmune, Polynoma, Polaris, Genentech, FStar, Beigene, Sellas Life Sciences, Lilly, Tizona Therapeutics Inc, Amgen, Chugai Pharma, Adaptive Biotechnologies, Ascentage Pharma, and Janssen Oncology; research funding from Bristol-Myers Squibb, MedImmune, and Genentech/Roche; patents, royalties, or intellectual property as a co-inventor of an issued patent for DNA vaccines for treatment of cancer in companion animals and as a co-inventor on a patent for use of oncolytic Newcastle Disease virus; and travel, accommodations, or expenses from Bristol-Myers Squibb, Chugai Pharma, Roche, and Janssen. The other authors have no conflict of interest to declare.

Received: December 2, 2017

Revised: February 9, 2018

Accepted: March 16, 2018

Published: April 12, 2018

#### REFERENCES

- Anagnostou, V., Smith, K.N., Forde, P.M., Niknafs, N., Bhattacharya, R., White, J., Zhang, T., Adleff, V., Phallen, J., Wali, N., et al. (2017). Evolution of neoantigen landscape during immune checkpoint blockade in non-small cell lung cancer. *Cancer Discov.* 7, 264–276.
- Borghaei, H., Paz-Ares, L., Horn, L., Spigel, D.R., Steins, M., Ready, N.E., Chow, L.Q., Vokes, E.E., Felip, E., Holgado, E., et al. (2015). Nivolumab versus docetaxel in advanced nonsquamous non-small-cell lung cancer. *N. Engl. J. Med.* 373, 1627–1639.
- Burr, M.L., Sparbier, C.E., Chan, Y.C., Williamson, J.C., Woods, K., Beavis, P.A., Lam, E.Y.N., Henderson, M.A., Bell, C.C., Stolzenburg, S., et al. (2017). CMTM6 maintains the expression of PD-L1 and regulates anti-tumour immunity. *Nature* 549, 101–105.
- Campbell, J.D., Alexandrov, A., Kim, J., Waia, J., Berger, A.H., Pedamallu, C.S., Shukla, S.A., Guo, G., Brooks, A.N., Murray, B.A., et al. (2016). *Nat. Genet.* 48, 607–616.
- Carbone, D.P., Reck, M., Paz-Ares, L., Creelan, B., Horn, L., Steins, M., Felip, E., van den Heuvel, M.M., Ciuleanu, T.E., Badin, F., et al. (2017). First-line nivolumab in stage IV or recurrent non-small-cell lung cancer. *N. Engl. J. Med.* 376, 2415–2426.
- Carter, S.L., Cibulskis, K., Helman, E., McKenna, A., Shen, H., Zack, T., Laird, P.W., Onofrio, R.C., Winckler, W., Weir, B.A., et al. (2012). Absolute quantification of somatic DNA alterations in human cancer. *Nat. Biotechnol.* 30, 413–421.
- Chalmers, Z.R., Connelly, C.F., Fabrizio, D., Gay, L., Ali, S.M., Ennis, R., Schrock, A., Campbell, B., Shlien, A., Chmielecki, J., et al. (2017). Analysis of 100,000 human cancer genomes reveals the landscape of tumor mutational burden. *Genome Med.* 9, 34.
- Cibulskis, K., Lawrence, M.S., Carter, S.L., Sivachenko, A., Jaffe, D., Sougnez, C., Gabriel, S., Meyerson, M., Lander, E.S., and Getz, G. (2013). Sensitive detection of somatic point mutations in impure and heterogeneous cancer samples. *Nat. Biotechnol.* 31, 213–219.
- Cibulskis, K., McKenna, A., Fennell, T., Banks, E., DePristo, M., and Getz, G. (2011). ContEst: estimating cross-contamination of human samples in next-generation sequencing data. *Bioinformatics* 27, 2601–2602.
- Costello, M., Pugh, T.J., Fennell, T.J., Stewart, C., Lichtenstein, L., Meldrum, J.C., Fostel, J.L., Friedrich, D.C., Perrin, D., Dionne, D., et al. (2013). Discovery and characterization of artifactual mutations in deep coverage targeted capture sequencing data due to oxidative DNA damage during sample preparation. *Nucleic Acids Res.* 41, e67.
- Curran, M.A., Montalvo, W., Yagita, H., and Allison, J.P. (2010). PD-1 and CTLA-4 combination blockade expands infiltrating T cells and reduces regulatory T and myeloid cells within B16 melanoma tumors. *Proc. Natl. Acad. Sci. USA* 107, 4275–4280.
- DePristo, M.A., Banks, E., Poplin, R., Garimella, K.V., Maguire, J.R., Hartl, C., Philippakis, A.A., del Angel, G., Rivas, M.A., Hanna, M., et al. (2011). A framework for variation discovery and genotyping using next-generation DNA sequencing data. *Nat. Genet.* 43, 491–498.
- Dong, Z.Y., Zhong, W.Z., Zhang, X.C., Su, J., Xie, Z., Liu, S.Y., Tu, H.Y., Chen, H.J., Sun, Y.L., Zhou, Q., et al. (2017). Potential predictive value of TP53 and KRAS mutation status for response to PD-1 blockade immunotherapy in lung adenocarcinoma. *Clin. Cancer Res.* 23, 3012–3024.
- Eisenhauer, E.A., Therasse, P., Bogaerts, J., Schwartz, L.H., Sargent, D., Ford, R., Dancy, J., Arbuck, S., Gwyther, S., Mooney, M., et al. (2009). New response evaluation criteria in solid tumours: revised RECIST guideline (version 1.1). *Eur. J. Cancer* 45, 228–247.
- Fabrizio, D., Malboeuf, C., Lieber, D., Zhong, S., He, J., White, E., Coyne, M., Silterra, J., Brennan, T., Ma, J., et al. (2017). 102PAnalytic validation of a next generation sequencing assay to identify tumor mutational burden from blood (bTMB) to support investigation of an anti-PD-L1 agent, atezolizumab, in a first line non-small cell lung cancer trial (BFAST). *Ann. Oncol.* 28, mdx363.018.
- Frampton, G.M., Fichtenholtz, A., Otto, G.A., Wang, K., Downing, S.R., He, J., Schnall-Levin, M., White, J., Sanford, E.M., An, P., et al. (2013). Development

- and validation of a clinical cancer genomic profiling test based on massively parallel DNA sequencing. *Nat. Biotechnol.* 31, 1023–1031.
- Gandara, D.R., Kowanzet, M., Mok, T.S.K., Rittmeyer, A., Fehrenbacher, L., Fabrizio, D., Otto, G., Malboeuf, C., Lieber, D., Paul, S.M., et al. (2017). 1295OBlood-based biomarkers for cancer immunotherapy: tumor mutational burden in blood (bTMB) is associated with improved atezolizumab (atezo) efficacy in 2L+ NSCLC (POPLAR and OAK). *Ann. Oncol.* 28, mdx380.
- Gao, J., Shi, L.Z., Zhao, H., Chen, J., Xiong, L., He, Q., Chen, T., Roszik, J., Bernatchez, C., Woodman, S.E., et al. (2016). Loss of IFN-gamma pathway genes in tumor cells as a mechanism of resistance to anti-CTLA-4 therapy. *Cell* 167, 397–404.e9.
- George, S., Miao, D., Demetri, G.D., Adeegbe, D., Rodig, S.J., Shukla, S., Lipschitz, M., Amin-Mansour, A., Raut, C.P., Carter, S.L., et al. (2017). Loss of PTEN is associated with resistance to anti-PD-1 checkpoint blockade therapy in metastatic uterine leiomyosarcoma. *Immunity* 46, 197–204.
- Glanville, J., Huang, H., Nau, A., Hatton, O., Wagar, L.E., Rubelt, F., Ji, X., Han, A., Krams, S.M., Pettus, C., et al. (2017). Identifying specificity groups in the T cell receptor repertoire. *Nature* 547, 94–98.
- Goodman, A.M., Kato, S., Bazhenova, L., Patel, S.P., Frampton, G.M., Miller, V., Stephens, P.J., Daniels, G.A., and Kurzrock, R. (2017). Tumor mutational burden as an independent predictor of response to immunotherapy in diverse cancers. *Mol. Cancer Ther.* 16, 2598–2608.
- Gubin, M.M., Zhang, X., Schuster, H., Caron, E., Ward, J.P., Noguchi, T., Ivanova, Y., Hundal, J., Arthur, C.D., Krebber, W.J., et al. (2014). Checkpoint blockade cancer immunotherapy targets tumour-specific mutant antigens. *Nature* 515, 577–581.
- Hadrup, S.R., Bakker, A.H., Shu, C.J., Andersen, R.S., van Veluw, J., Hombrink, P., Castermans, E., Thor Straten, P., Blank, C., Haanen, J.B., et al. (2009). Parallel detection of antigen-specific T-cell responses by multidimensional encoding of MHC multimers. *Nat. Methods* 6, 520–526.
- Hammers, H.J., Plimack, E.R., Infante, J.R., Rini, B.I., McDermott, D.F., Lewis, L.D., Voss, M.H., Sharma, P., Pal, S.K., Razak, A.R.A., et al. (2017). Safety and efficacy of nivolumab in combination with ipilimumab in metastatic renal cell carcinoma: the CheckMate 016 study. *J. Clin. Oncol.* 35, 3851–3858.
- Hellmann, M.D., Callahan, M.K., Awad, M.M., Calvo, E., Ascierto, P.A., Atmaca, A., Rizvi, N.A., Hirsch, F.R., Selvaggi, G., Szustakowski, J.D., et al. (2018). Tumor mutation burden and efficacy of nivolumab monotherapy and in combination with ipilimumab in small cell lung cancer. *Cancer Cell*. <https://doi.org/10.1016/j.ccell.2018.04.001>.
- Hellmann, M.D., Rizvi, N.A., Goldman, J.W., Gettinger, S.N., Borghaei, H., Brahmer, J.R., Ready, N.E., Gerber, D.E., Chow, L.Q., Juergens, R.A., et al. (2017). Nivolumab plus ipilimumab as first-line treatment for advanced non-small-cell lung cancer (CheckMate 012): results of an open-label, phase 1, multicohort study. *Lancet Oncol.* 18, 31–41.
- Karosiene, E., Lundegaard, C., Lund, O., and Nielsen, M. (2012). NetMHCcons: a consensus method for the major histocompatibility complex class I predictions. *Immunogenetics* 64, 177–186.
- Landau, D.A., Carter, S.L., Stojanov, P., McKenna, A., Stevenson, K., Lawrence, M.S., Sougnez, C., Stewart, C., Sivachenko, A., Wang, L., et al. (2013). Evolution and impact of subclonal mutations in chronic lymphocytic leukemia. *Cell* 152, 714–726.
- Lawrence, M.S., Stojanov, P., Polak, P., Kryukov, G.V., Cibulskis, K., Sivachenko, A., Carter, S.L., Stewart, C., Mermel, C.H., Roberts, S.A., et al. (2013). Mutational heterogeneity in cancer and the search for new cancer-associated genes. *Nature* 499, 214–218.
- Le, D.T., Durham, J.N., Smith, K.N., Wang, H., Bartlett, B.R., Aulakh, L.K., Lu, S., Kemberling, H., Wilt, C., Luber, B.S., et al. (2017). Mismatch repair deficiency predicts response of solid tumors to PD-1 blockade. *Science* 357, 409–413.
- Levine, A.J., and Oren, M. (2009). The first 30 years of p53: growing ever more complex. *Nat. Rev. Cancer* 9, 749–758.
- Li, H., and Durbin, R. (2009). Fast and accurate short read alignment with Burrows-Wheeler transform. *Bioinformatics* 25, 1754–1760.
- Luksza, M., Riaz, N., Makarov, V., Balachandran, V.P., Hellmann, M.D., Solovyov, A., Rizvi, N.A., Merghoub, T., Levine, A.J., Chan, T.A., et al. (2017). A neoantigen fitness model predicts tumour response to checkpoint blockade immunotherapy. *Nature* 551, 517–520.
- Manguso, R.T., Pope, H.W., Zimmer, M.D., Brown, F.D., Yates, K.B., Miller, B.C., Collins, N.B., Bi, K., LaFleur, M.W., Juneja, V.R., et al. (2017). In vivo CRISPR screening identifies Ptpn22 as a cancer immunotherapy target. *Nature* 547, 413–418.
- McGranahan, N., Furness, A.J., Rosenthal, R., Ramskov, S., Lyngaa, R., Saini, S.K., Jamal-Hanjani, M., Wilson, G.A., Birkbak, N.J., Hiley, C.T., et al. (2016). Clonal neoantigens elicit T cell immunoreactivity and sensitivity to immune checkpoint blockade. *Science* 351, 1463–1469.
- Mezzadra, R., Sun, C., Jae, L.T., Gomez-Eerland, R., de Vries, E., Wu, W., Logtenberg, M.E.W., Slagter, M., Rozeman, E.A., Hofland, I., et al. (2017). Identification of CMTM6 and CMTM4 as PD-L1 protein regulators. *Nature* 549, 106–110.
- Nathanson, T., Ahuja, A., Rubinsteyn, A., Aksoy, B.A., Hellmann, M.D., Miao, D., Van Allen, E., Merghoub, T., Wolchok, J.D., Snyder, A., and Hammerbacher, J. (2017). Somatic mutations and neopeptide homology in melanomas treated with CTLA-4 blockade. *Cancer Immunol. Res.* 5, 84–91.
- Ott, P.A., Hu, Z., Keskin, D.B., Shukla, S.A., Sun, J., Bozym, D.J., Zhang, W., Luoma, A., Giobbie-Hurder, A., Peter, L., et al. (2017). An immunogenic personal neoantigen vaccine for patients with melanoma. *Nature* 547, 217–221.
- Patel, S.J., Sanjana, N.E., Kishton, R.J., Eidizadeh, A., Vodnala, S.K., Cam, M., Gartner, J.J., Jia, L., Steinberg, S.M., Yamamoto, T.N., et al. (2017). Identification of essential genes for cancer immunotherapy. *Nature* 548, 537–542.
- Pfeifer, G.P., Denissenko, M.F., Olivier, M., Tretyakova, N., Hecht, S.S., and Hainaut, P. (2002). Tobacco smoke carcinogens, DNA damage and p53 mutations in smoking-associated cancers. *Oncogene* 21, 7435–7451.
- Reck, M., Rodriguez-Abreu, D., Robinson, A.G., Hui, R., Csozsi, T., Fulop, A., Gottfried, M., Peled, N., Tafreshi, A., Cuffe, S., et al. (2016). Pembrolizumab versus chemotherapy for PD-L1-positive non-small-cell lung cancer. *N. Engl. J. Med.* 375, 1823–1833.
- Rizvi, N.A., Hellmann, M.D., Snyder, A., Kvistborg, P., Makarov, V., Havel, J.J., Lee, W., Yuan, J., Wong, P., Ho, T.S., et al. (2015). Cancer immunology. Mutational landscape determines sensitivity to PD-1 blockade in non-small cell lung cancer. *Science* 348, 124–128.
- Rizvi, H., Sanchez-Vega, F., La, K., Chatila, W., Jonsson, P., Halpenny, D., Plodkowski, A., Long, N., Sauter, J.L., Rekhtman, N., et al. (2018). Molecular determinants of response to anti-programmed cell death (PD)-1 and anti-programmed death-ligand (PD-L)-Ligand 1 blockade in patients with non-small-cell lung cancer profiled with targeted next-generation sequencing. *J. Clin. Oncol.* 36, 633–641.
- Rooney, M.S., Shukla, S.A., Wu, C.J., Getz, G., and Hacohen, N. (2015). Molecular and genetic properties of tumors associated with local immune cytolytic activity. *Cell* 160, 48–61.
- Rosenberg, J.E., Hoffman-Censits, J., Powles, T., van der Heijden, M.S., Balar, A.V., Necchi, A., Dawson, N., O'Donnell, P.H., Balmanoukian, A., Loriot, Y., et al. (2016). Atezolizumab in patients with locally advanced and metastatic urothelial carcinoma who have progressed following treatment with platinum-based chemotherapy: a single-arm, multicentre, phase 2 trial. *Lancet* 387, 1909–1920.
- Sahin, U., Derhovanessian, E., Miller, M., Kloke, B.P., Simon, P., Lower, M., Bukur, V., Tadmor, A.D., Luxemburger, U., Schrors, B., et al. (2017). Personalized RNA mutanome vaccines mobilize poly-specific therapeutic immunity against cancer. *Nature* 547, 222–226.
- Schumacher, T.N., and Schreiber, R.D. (2015). Neoantigens in cancer immunotherapy. *Science* 348, 69–74.
- Skoulidis, F., Byers, L.A., Diao, L., Papadimitrakopoulou, V.A., Tong, P., Izzo, J., Behrens, C., Kadara, H., Parra, E.R., Canales, J.R., et al. (2015). Co-occurring genomic alterations define major subsets of KRAS-mutant lung adenocarcinoma with distinct biology, immune profiles, and therapeutic vulnerabilities. *Cancer Discov.* 5, 860–877.

- Snyder, A., Makarov, V., Merghoub, T., Yuan, J., Zaretsky, J.M., Desrichard, A., Walsh, L.A., Postow, M.A., Wong, P., Ho, T.S., et al. (2014). Genetic basis for clinical response to CTLA-4 blockade in melanoma. *N.Engl. J. Med.* *371*, 2189–2199.
- Snyder, A., Nathanson, T., Funt, S.A., Ahuja, A., Buros Novik, J., Hellmann, M.D., Chang, E., Aksoy, B.A., Al-Ahmadie, H., Yusko, E., et al. (2017). Contribution of systemic and somatic factors to clinical response and resistance to PD-L1 blockade in urothelial cancer: an exploratory multi-omic analysis. *PLoS Med.* *14*, e1002309.
- Szolek, A., Schubert, B., Mohr, C., Sturm, M., Feldhahn, M., and Kohlbacher, O. (2014). OptiType: precision HLA typing from next-generation sequencing data. *Bioinformatics* *30*, 3310–3316.
- Taube, J.M., Klein, A., Brahmer, J.R., Xu, H., Pan, X., Kim, J.H., Chen, L., Pardoll, D.M., Topalian, S.L., and Anders, R.A. (2014). Association of PD-1, PD-1 ligands, and other features of the tumor immune microenvironment with response to anti-PD-1 therapy. *Clin. Cancer Res.* *20*, 5064–5074.
- Taylor-Weiner, A., Zack, T., O'Donnell, E., Guerriero, J.L., Bernard, B., Reddy, A., Han, G.C., AlDubayan, S., Amin-Mansour, A., Schumacher, S.E., et al. (2016). Genomic evolution and chemoresistance in germ-cell tumours. *Nature* *540*, 114–118.
- Tran, E., Ahmadzadeh, M., Lu, Y.C., Gros, A., Turcotte, S., Robbins, P.F., Gartner, J.J., Zheng, Z., Li, Y.F., Ray, S., et al. (2015). Immunogenicity of somatic mutations in human gastrointestinal cancers. *Science* *350*, 1387–1390.
- Van Allen, E.M., Miao, D., Schilling, B., Shukla, S.A., Blank, C., Zimmer, L., Sucker, A., Hillen, U., Foppen, M.H., Goldinger, S.M., et al. (2015). Genomic correlates of response to CTLA-4 blockade in metastatic melanoma. *Science* *350*, 207–211.
- Van Allen, E.M., Wagle, N., Stojanov, P., Perrin, D.L., Cibulskis, K., Marlow, S., Jane-Vaibuena, J., Friedrich, D.C., Kryukov, G., Carter, S.L., et al. (2014). Whole-exome sequencing and clinical interpretation of formalin-fixed, paraffin-embedded tumor samples to guide precision cancer medicine. *Nat. Med.* *20*, 682–688.
- van Rooij, N., van Buuren, M.M., Philips, D., Velds, A., Toebes, M., Heemskerk, B., van Dijk, L.J., Behjati, S., et al. (2013). Tumor exome analysis reveals neo-antigen-specific T-cell reactivity in an ipilimumab-responsive melanoma. *J. Clin. Oncol.* *31*, e439–e442.
- Wei, S.C., Levine, J.H., Cogdill, A.P., Zhao, Y., Anang, N.A.S., Andrews, M.C., Sharma, P., Wang, J., Wargo, J.A., Pe'er, D., and Allison, J.P. (2017). Distinct cellular mechanisms underlie anti-CTLA-4 and anti-PD-1 checkpoint blockade. *Cell* *170*, 1120–1133.e17.
- Wolchok, J.D., Chiarion-Sileni, V., Gonzalez, R., Rutkowski, P., Grob, J.J., Cowey, C.L., Lao, C.D., Wagstaff, J., Schadendorf, D., Ferrucci, P.F., et al. (2017). Overall survival with combined nivolumab and ipilimumab in advanced melanoma. *N. Engl. J. Med.* *377*, 1345–1356.
- Zaretsky, J.M., Garcia-Diaz, A., Shin, D.S., Escuin-Ordinas, H., Hugo, W., Hu-Lieskovan, S., Torrejon, D.Y., Abril-Rodriguez, G., Sandoval, S., Barthly, L., et al. (2016). Mutations associated with acquired resistance to PD-1 blockade in melanoma. *N. Engl. J. Med.* *375*, 819–829.
- Zehir, A., Benayed, R., Shah, R.H., Syed, A., Middha, S., Kim, H.R., Srinivasan, P., Gao, J., Chakravarty, D., Devlin, S.M., et al. (2017). Mutational landscape of metastatic cancer revealed from prospective clinical sequencing of 10,000 patients. *Nat. Med.* *23*, 703–713.

## STAR★METHODS

## KEY RESOURCES TABLE

| REAGENT or RESOURCE                                                     | SOURCE                                                                                                                                                                                              | IDENTIFIER                                                                                                                                                                                              |
|-------------------------------------------------------------------------|-----------------------------------------------------------------------------------------------------------------------------------------------------------------------------------------------------|---------------------------------------------------------------------------------------------------------------------------------------------------------------------------------------------------------|
| <b>Antibodies</b>                                                       |                                                                                                                                                                                                     |                                                                                                                                                                                                         |
| PD-L1                                                                   | Dako                                                                                                                                                                                                | Clone 28-8                                                                                                                                                                                              |
| <b>Biological Samples</b>                                               |                                                                                                                                                                                                     |                                                                                                                                                                                                         |
| Human tumor biopsy tissue                                               | Memorial Sloan Kettering Cancer Center, New York, NY; H. Lee Moffit Cancer Center and Research Institute, Tampa, FL; Fox Chase Cancer Center, Philadelphia, PA; Bristol Myers Squibb, Princeton, NJ | <a href="https://clinicaltrials.gov/ct2/show/NCT01454102">https://clinicaltrials.gov/ct2/show/NCT01454102</a>                                                                                           |
| <b>Critical Commercial Assays</b>                                       |                                                                                                                                                                                                     |                                                                                                                                                                                                         |
| Agilent Sure-Select Human All Exon v2.0 (44Mb) kit                      | Agilent                                                                                                                                                                                             | <a href="https://www.genomics.agilent.com/article.jsp?pagelid=3042">https://www.genomics.agilent.com/article.jsp?pagelid=3042</a>                                                                       |
| Agilent Sure-Select Human All Exon v4.0 (51Mb) kit                      | Agilent                                                                                                                                                                                             | <a href="https://www.genomics.agilent.com/article.jsp?pagelid=3042">https://www.genomics.agilent.com/article.jsp?pagelid=3042</a>                                                                       |
| Rapid Capture Exome (38Mb) kit                                          | Illumina                                                                                                                                                                                            | <a href="https://support.illumina.com/sequencing/sequencing_kits/nextera-rapid-capture-exome-kit.html">https://support.illumina.com/sequencing/sequencing_kits/nextera-rapid-capture-exome-kit.html</a> |
| <b>Deposited Data</b>                                                   |                                                                                                                                                                                                     |                                                                                                                                                                                                         |
| Human sequencing data, for 43 patients with consent to share these data | This paper                                                                                                                                                                                          | <a href="https://www.ebi.ac.uk/eva/?eva-study=PRJEB24995">https://www.ebi.ac.uk/eva/?eva-study=PRJEB24995</a>                                                                                           |
| TCGA processed data (LUAD)                                              | <a href="#">Campbell et al., 2016</a> (PMID 27158780)                                                                                                                                               | <a href="https://portal.gdc.cancer.gov/legacy-archive/files/b2e25bdf-f2b5-4a37-b330-05251ea09f2c">https://portal.gdc.cancer.gov/legacy-archive/files/b2e25bdf-f2b5-4a37-b330-05251ea09f2c</a>           |
| TCGA processed data (LUSC)                                              | <a href="#">Campbell et al., 2016</a> (PMID 27158780)                                                                                                                                               | <a href="https://portal.gdc.cancer.gov/legacy-archive/files/d7e90ea9-49b5-4efc-9f78-bd5244cd6367">https://portal.gdc.cancer.gov/legacy-archive/files/d7e90ea9-49b5-4efc-9f78-bd5244cd6367</a>           |
| <b>Software and Algorithms</b>                                          |                                                                                                                                                                                                     |                                                                                                                                                                                                         |
| Burrows-Wheeler Aligner (BWA) version 0.5.9-tpx                         | <a href="#">Li and Durbin, 2009</a> (PMID 19451168)                                                                                                                                                 | <a href="http://maq.sourceforge.net/">http://maq.sourceforge.net/</a>                                                                                                                                   |
| Genome Analysis Toolkit (GATK) version nightly-2015-07-31-g3c929b0      | <a href="#">DePristo et al., 2011</a> (PMID 21778889)                                                                                                                                               | <a href="https://software.broadinstitute.org/gatk/">https://software.broadinstitute.org/gatk/</a>                                                                                                       |
| ContEst                                                                 | <a href="#">Cibulskis et al., 2011</a> (PMID 21803805)                                                                                                                                              | <a href="http://archive.broadinstitute.org/cancer/cga/contest">http://archive.broadinstitute.org/cancer/cga/contest</a>                                                                                 |
| OxoG3                                                                   | <a href="#">Costello et al., 2013</a> (PMID 23303777)                                                                                                                                               | <a href="http://archive.broadinstitute.org/cancer/cga/dtoxog">http://archive.broadinstitute.org/cancer/cga/dtoxog</a>                                                                                   |
| MuTect version v1.1.6                                                   | <a href="#">Cibulskis et al., 2013</a> (PMID 25143287)                                                                                                                                              | <a href="http://archive.broadinstitute.org/cancer/cga/mutect">http://archive.broadinstitute.org/cancer/cga/mutect</a>                                                                                   |
| Indelocator                                                             |                                                                                                                                                                                                     | <a href="http://archive.broadinstitute.org/cancer/cga/indelocator">http://archive.broadinstitute.org/cancer/cga/indelocator</a>                                                                         |
| Varcode v0.5.15                                                         |                                                                                                                                                                                                     | <a href="https://github.com/hammerlab/varcode">https://github.com/hammerlab/varcode</a>                                                                                                                 |
| PyEnsembl v1.0.3                                                        |                                                                                                                                                                                                     | <a href="https://github.com/hammerlab/pyensembl">https://github.com/hammerlab/pyensembl</a>                                                                                                             |
| OptiType                                                                | <a href="#">Snyder et al., 2017</a> (PMID 28552987); <a href="#">Szolek et al., 2014</a> (PMID 25143287)                                                                                            | <a href="https://github.com/FRED-2/OptiType">https://github.com/FRED-2/OptiType</a>                                                                                                                     |
| Topiary                                                                 | <a href="#">Nathanson et al., 2017</a> (PMID 27956380)                                                                                                                                              | <a href="https://github.com/hammerlab/topiary/">https://github.com/hammerlab/topiary/</a>                                                                                                               |
| ABSOLUTE                                                                | <a href="#">Carter et al., 2012</a> (PMID 22544022)                                                                                                                                                 | <a href="http://archive.broadinstitute.org/cancer/cga/absolute">http://archive.broadinstitute.org/cancer/cga/absolute</a>                                                                               |
| NetMHCcons                                                              | <a href="#">Karosiene et al., 2012</a> (PMID 22009319)                                                                                                                                              | <a href="http://www.cbs.dtu.dk/services/NetMHCcons/">http://www.cbs.dtu.dk/services/NetMHCcons/</a>                                                                                                     |

(Continued on next page)

**Continued**

| REAGENT or RESOURCE | SOURCE                                 | IDENTIFIER                                                                                                                                                                              |
|---------------------|----------------------------------------|-----------------------------------------------------------------------------------------------------------------------------------------------------------------------------------------|
| MutSigCV            | Lawrence et al., 2013 (PMID 23770567); | <a href="http://software.broadinstitute.org/cancer/software/genepattern/modules/docs/MutSigCV">http://software.broadinstitute.org/cancer/software/genepattern/modules/docs/MutSigCV</a> |
| GraphPad Prism v.6  | GraphPad Software                      | <a href="https://www.graphpad.com/">https://www.graphpad.com/</a>                                                                                                                       |
| R 3.3.2             | R software                             | <a href="https://www.r-project.org/">https://www.r-project.org/</a>                                                                                                                     |

**CONTACT FOR REAGENT AND RESOURCE SHARING**

Further information and requests for resources should be directed to and will be fulfilled by the Lead Contact, Matthew Hellmann ([hellmanm@mskcc.org](mailto:hellmanm@mskcc.org)).

**EXPERIMENTAL MODEL AND SUBJECT DETAILS****Combination Immunotherapy Treated Patients**

All patients had stage IV non-small cell lung cancer (NSCLC) and were treated on CheckMate 012 (NCT01454102 (Hellmann et al., 2017)) (Table S1 and Table S2). All patients initiated therapy between February 2013 and March 2015 and were treated with a combination of nivolumab and ipilimumab. All patients consented to an Institutional Review Board-approved study protocol for treatment, tissue collection, and biomarker analysis at institutions that participated in CheckMate 012 (Memorial Sloan Kettering Cancer Center, H Lee Moffitt Cancer Center, Fox Chase Cancer Center, UCLA, Jonsson Comprehensive Cancer Center, Jonsson Comprehensive Cancer Center, Yale Comprehensive Cancer Center, Sidney Kimmel Comprehensive Cancer Center at Johns Hopkins, Duke University Medical Center, UT Southwestern Medical Center, University of Washington, Juravinski Cancer Centre, McMaster University, Princess Margaret Cancer Centre, University of Toronto, Ottawa Hospital Cancer Centre, University of Ottawa). PD-L1 expression was assessed by immunohistochemistry using a previously validated rabbit anti-human anti-PD-L1 monoclonal antibody (clone 28-8; Epitomics, Berlingame, CA, USA). Quantification of tumor membranous PD-L1 expression was performed centrally on pre-treatment tumor tissue submitted as part of the clinical trial using an analytically validated automated assay developed by Dako (Carpinteria, CA, USA). A minimum of 100 evaluable tumor cells were required for determination of PD-L1 expression. PD-L1 scoring was available in 70 of 75 patients; five had unknown expression.

**Clinical Efficacy Analyses**

Per protocol, tumor assessments were collected at week 10, week 17, week 23, and then every 12 weeks until progression. Objective response was assessed by investigator-assessed RECIST v1.1 (Eisenhauer et al., 2009). Partial and complete responses were confirmed by repeat imaging occurring at least 4 weeks after the initial identification of response; unconfirmed partial responses were considered stable disease. Patients with confirmed complete or partial response were considered responders; patients with stable disease, progressive disease, or not evaluable were considered non-responders.

We also used a related outcome metric, durable clinical benefit (DCB), which we have previously described (Rizvi et al., 2015; Rizvi et al., 2018). DCB was defined as stable disease or partial response lasting longer than 6 months; all other patients were considered to have no durable benefit (NDB).

Progression-free survival was assessed as previously described (Hellmann et al., 2017), with outcomes determined as of the September 2016 database lock.

**Tumor and Germline Samples**

All tumor tissue used for sequencing was obtained prior to dosing with combination immunotherapy, with the exception of one non-responder whose tissue was collected 122 days after beginning therapy (ID# 4). The presence of tumor tissue in the sequenced samples was confirmed by examination of a representative hematoxylin and eosin-stained slide by thoracic pathologist (N.R.) or central pathology vendor through Mosaic Labs. Germline DNA was obtained from peripheral blood mononuclear cells from all patients.

**METHOD DETAILS****Whole Exome Capture and Sequencing**

Whole exome capture libraries were constructed using the Agilent Sure-Select Human All Exon v2.0 (44Mb), v4.0 (51Mb), or Illumina's Rapid Capture Exome (38Mb) baited target kit. Enriched exome libraries were sequenced on a HiSeq 2000, 2500, or 4000 platform (Illumina, San Diego, California) to generate paired-end reads (2x76bp) to a goal of 150X mean target coverage (n=70 sequenced at the Broad Institute, Cambridge, MA; n=5 sequenced at Memorial Sloan Kettering Cancer Center Genomic Core, New York, NY).

### Exome Alignment and Assembly

For each case, a BAM file was produced by aligning tumor and normal sequences to the hg19 human genome build using the Burrows-Wheeler Aligner (BWA) version 0.5.9-tpx (Li and Durbin, 2009). Further indel realignment, base-quality score recalibration, and duplicate-read removal were performed using the Genome Analysis Toolkit (GATK) version nightly-2015-07-31-g3c929b0 (DePristo et al., 2011).

### Sequencing Quality Control

Quality control metrics were computed using the Broad Institute Picard software. Fingerprint genotypes were used to verify match of tumor and normal samples. Potential contamination was estimated using ContEst (Cibulskis et al., 2011). Artifacts produced by oxidation during DNA sequencing were removed using the OxoG3 filter (Costello et al., 2013). Samples with mean target coverage <60X in tumor or <30X in normal were excluded (Table S3).

### Variant Calling

MuTect version v1.1.6 (Cibulskis et al., 2013) was used to generate single nucleotide variant (SNV) calls using default parameters. Indelocator (<http://archive.broadinstitute.org/cancer/cga/indelocator>) was used to generate indel calls. Mutations with variant allelic fraction < 0.05 in tumor were excluded (Taylor-Weiner et al., 2016). Site based artifact filtering was applied to mutations with variant alleles that were present in an independent panel of normal exomes derived from blood samples of non-cancer patients. Variants were annotated by Varcode (v. 0.5.15, <https://github.com/hammerlab/varcode>) and PyEnsembl (v. 1.0.3, <https://github.com/hammerlab/pyensembl>) using Ensembl Release 75.

### Mutation Burden Quantification

Tumor mutation burden (TMB) was defined as the number of nonsynonymous alterations (SNVs or indels) for each patient (Table S3).

### Mutation Burden Percentile Rank Compared to NSCLC Tumors Sequenced by TCGA

To compare the overall spectrum of TMB and determine the percentile rank of TMB of patients sequenced in this study relative to the TMB seen in larger series of NSCLCs, MAF files of called variants were retrieved from tumors analyzed as part of the lung adenocarcinoma and lung squamous cell carcinoma by The Cancer Genome Atlas (TCGA) projects (Campbell et al., 2016). Mutations with VAF < 0.05 were excluded. For TCGA participants with multiple samples, a single sample was chosen. To reflect a typical histologic distribution of NSCLC, we used all LUAD participants present in the MAF files (n=569) and selected a subset of available LUSC participants (n=141 (29%) of 491 participants) to create a set of 710 samples comprised of 80% adenocarcinoma and 20% squamous cell carcinoma (Table S3). The TMB of samples in this study were then compared to the TMB of the NSCLC TCGA cohort to assign each sample a percentile rank.

### HLA Analysis

Four-digit class I HLA alleles were inferred using OptiType (<https://github.com/FRED-2/Optitype>) (Snyder et al., 2017; Szolek et al., 2014).

### In Silico Neoantigen Prediction Pipeline

Using Topiary (<https://github.com/hammerlab/topiary/>) (Nathanson et al., 2017), the mutated DNA sequences were virtually translated into corresponding mutated peptide sequences. Topiary was used to run NetMHCcons (v. 1.1) (Karosiene et al., 2012) in order to predict MHC class I binding affinity for all 8 to 11mer peptide sequences containing the mutated amino acid. For variants longer than a single residue, all 8-11mers downstream of the variant were considered. Candidate neoantigens were those peptides with binding affinity IC50 of  $\leq 500$ nM to one (or more) of the patient-specific HLA alleles (Table S3); strong binding candidate neoantigens were considered those with binding affinity IC50 of  $\leq 50$ nM.

### Predicted Neoantigen Clonality

To determine the cancer cell fraction (CCF) of each mutation, we integrated the variant allele frequency with the local copy number with purity and ploidy estimates. Each alteration, the variant allele frequency (VAF) depends on the local copy number of the tumor (CPNmut), the purity (p), the local copy number of the normal sample (CPNnorm) and also the cancer cell fraction (CCF), defined as the proportion of cancer cells harboring the mutations. The expected VAF, given the CCF, can be calculated as follows: CAF (CCF) =  $p \cdot \text{CCF} / \text{CPNnorm} (1-p) + p \cdot \text{CPNmut}$ .

For a given mutation with 'a' alternative reads, and a depth of 'N', the probability of a given CCF can be estimated using a binomial distribution  $P(\text{CCF}) = \text{binom}(a|N, \text{VAF}(\text{CCF}))$ . CCF values can then be calculated over a uniform grid of 100 CCF values (0.01, 1) and subsequently normalized to obtain a posterior distribution. To avoid overestimating the number of clonal alterations, we classified mutations as clonal if there was >0.5 probability that the cancer cell fraction was >0.95 (Landau et al., 2013). Clonality could be resolved in all but two patients. We restricted clonality estimation to single nucleotide variants, with copy number as assessed by ABSOLUTE (Carter et al., 2012).

### Recurrently Altered Genes

MutSigCV (version 1.4, (Lawrence et al., 2013)) was used to identify recurrently altered genes in both the IpiNivo cohort as well as the NSCLC TCGA cohort (Table S4). Genes with q values <0.1 were considered to be significantly recurrently mutated.

### QUANTIFICATION AND STATISTICAL ANALYSES

Differences in TMB between two groups were examined using the non-parametric Mann-Whitney test. Fisher's exact test was used to compare proportions between two groups, or chi-square test for three groups. For progression-free survival analysis, the log-rank test was used to compare Kaplan-Meier survival curves and the Mantel-Haenszel method was used to determine hazard ratios between groups. Correlations were examined by the Spearman correlation method. Receiver operator characteristic (ROC) curves plotting sensitivity and 1-specificity of continuous variables were assessed by generating the area under the curve; p-values were also reported. An analysis of enrichment in frequency of altered genes of *a priori* significance (Table S4) were examined using Odds ratio and Fisher's exact test. The frequency of recurrently altered genes identified by MutSigCV were compared in responder vs non-responder groups as well as high TMB vs low TMB groups using odds ratio and Fisher's exact text. All reported p-values are two sided. Correlations between mutation burden and PD-L1 expression were determined using the Spearman correlation formula. Multi-variable logistic and Cox regression were conducted to assess the impact of TMB on ORR and PFS, respectively, while adjusting for other covariates described. Statistical analyses were performed using GraphPad Prism v.6 and R 3.3.2.

### DATA AND SOFTWARE AVAILABILITY

Our dataset, for the 43 patients with consent to share these sequencing data, is deposited in the European Variation Archive. The accession number for the sequencing data is PRJEB24995, <https://www.ebi.ac.uk/eva/?eva-study=PRJEB24995>.

## Supplemental Information

### Genomic Features of Response to Combination

### Immunotherapy in Patients with Advanced

### Non-Small-Cell Lung Cancer

**Matthew D. Hellmann, Tavi Nathanson, Hira Rizvi, Benjamin C. Creelan, Francisco Sanchez-Vega, Arun Ahuja, Ai Ni, Jacki B. Novik, Levi M.B. Mangarin, Mohsen Abu-Akeel, Cailian Liu, Jennifer L. Sauter, Natasha Rekhtman, Eliza Chang, Margaret K. Callahan, Jamie E. Chaft, Martin H. Voss, Megan Tenet, Xue-Mei Li, Kelly Covello, Andrea Renninger, Patrik Vitazka, William J. Geese, Hossein Borghaei, Charles M. Rudin, Scott J. Antonia, Charles Swanton, Jeff Hammerbacher, Taha Merghoub, Nicholas McGranahan, Alexandra Snyder, and Jedd D. Wolchok**



**Table S1, related to Table 1:** Clinical characteristics of all patients in CheckMate-012 by whether or not profiled by whole exome sequencing.

| Patient Characteristics        | Overall Cohort<br>(n=197) |         | WES cohort<br>(n=75) |         | Non-WES cohort<br>(n=122) |         | p value*            |
|--------------------------------|---------------------------|---------|----------------------|---------|---------------------------|---------|---------------------|
|                                | No.                       | (%)     | No.                  | (%)     | No.                       | (%)     |                     |
| Median age, years (range)      | 63                        | (37-91) | 66                   | (42-87) | 63                        | (37-91) | 0.5864              |
| Gender                         |                           |         |                      |         |                           |         | 0.7692              |
| Male                           | 101                       | (51)    | 37                   | (49)    | 64                        | (52)    |                     |
| Female                         | 96                        | (49)    | 38                   | (51)    | 58                        | (48)    |                     |
| Histology                      |                           |         |                      |         |                           |         | 0.8612              |
| Non-squamous                   | 153                       | (78)    | 59                   | (79)    | 94                        | (77)    |                     |
| Squamous                       | 44                        | (22)    | 16                   | (21)    | 28                        | (23)    |                     |
| Smoking Status <sup>^</sup>    |                           |         |                      |         |                           |         | 0.3060              |
| Current/Former                 | 148                       | (76)    | 60                   | (80)    | 88                        | (73)    |                     |
| Never                          | 48                        | (24)    | 15                   | (20)    | 33                        | (27)    |                     |
| Performance Status             |                           |         |                      |         |                           |         | 0.4450              |
| ECOG 0                         | 71                        | (36)    | 30                   | (40)    | 41                        | (34)    |                     |
| ECOG 1                         | 126                       | (64)    | 45                   | (60)    | 81                        | (66)    |                     |
| PD-L1 expression               |                           |         |                      |         |                           |         | 0.8699 <sup>#</sup> |
| 0%                             | 56                        | (28)    | 25                   | (33)    | 33                        | (27)    |                     |
| ≥ 1%                           | 108                       | (55)    | 45                   | (60)    | 64                        | (52)    |                     |
| Unknown                        | 33                        | (17)    | 5                    | (7)     | 25                        | (21)    |                     |
| Best Overall Response          |                           |         |                      |         |                           |         | 0.5597              |
| Complete/Partial Response      | 63                        | (32)    | 24                   | (32)    | 39                        | (32)    |                     |
| Stable Disease                 | 63                        | (32)    | 27                   | (36)    | 36                        | (29)    |                     |
| Progression/Not evaluable      | 71                        | (36)    | 24                   | (32)    | 47                        | (39)    |                     |
| Clinical Benefit               |                           |         |                      |         |                           |         | 0.3013              |
| Durable Clinical Benefit (DCB) | 87                        | (44)    | 37                   | (49)    | 50                        | (41)    |                     |
| No durable benefit (NDB)       | 110                       | (56)    | 38                   | (51)    | 72                        | (59)    |                     |

\*Comparison of WES cohort vs Non-WES cohort using Fisher's exact test, except age (t test) and BOR (Chi-square test)

<sup>^</sup>Smoking status was not reported for one patient in the Non-WES cohort

<sup>#</sup>Reflects comparison of PD-L1 0% vs ≥ 1%

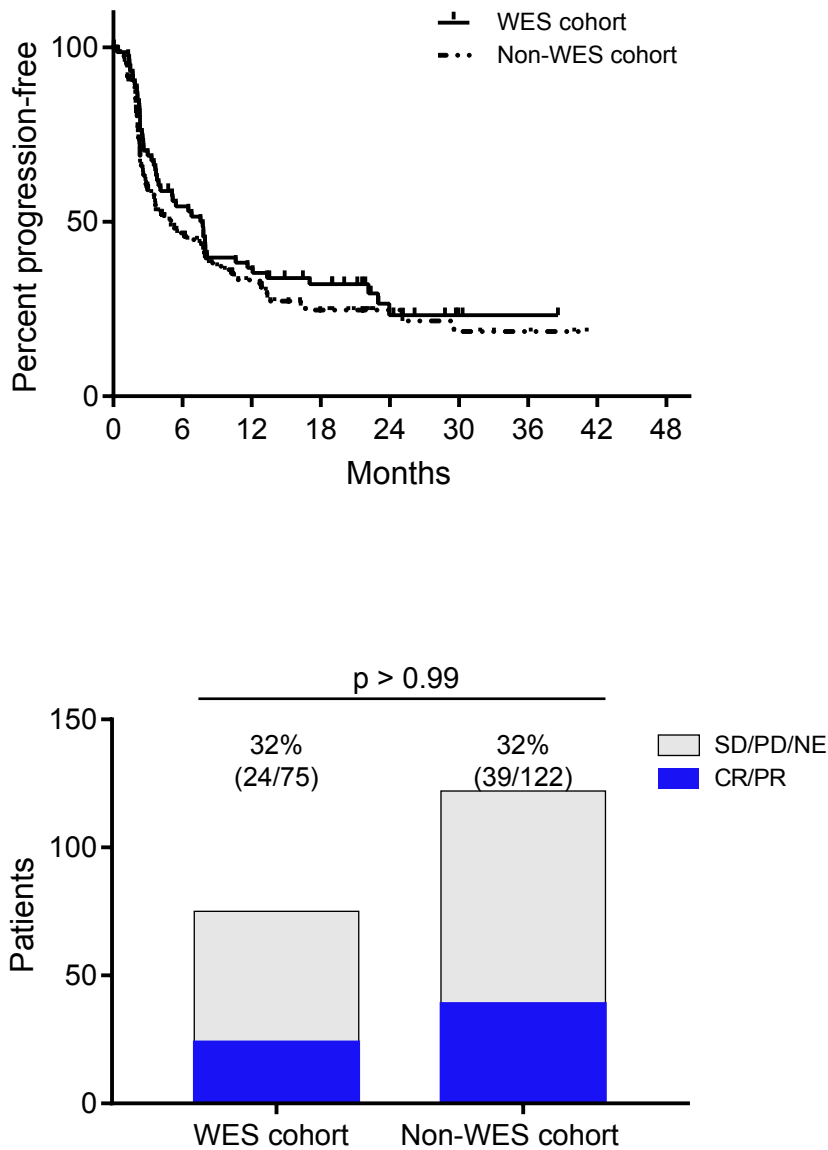

**Figure S1, related to Table 1:** Progression-free survival (PFS, top) and objective response rate (ORR, bottom) of the WES cohort (n = 75) vs other patients treated (non-WES, n = 122) with nivolumab plus ipilimumab as part of CheckMate-012. PFS was similar among the WES cohort and non-WES cohort (log-rank p = 0.30) (top panel). The proportion of responders was similar in the WES cohort vs non-WES cohort (Fisher's exact p > 0.99) (bottom panel). Percentages and rate (n/N) of responders in each group are reported above each bar and colored in blue.

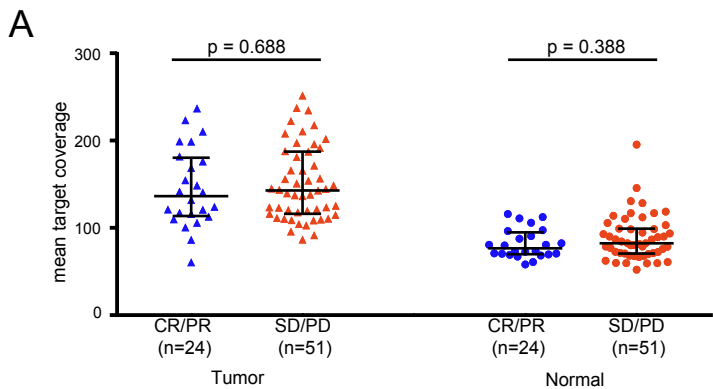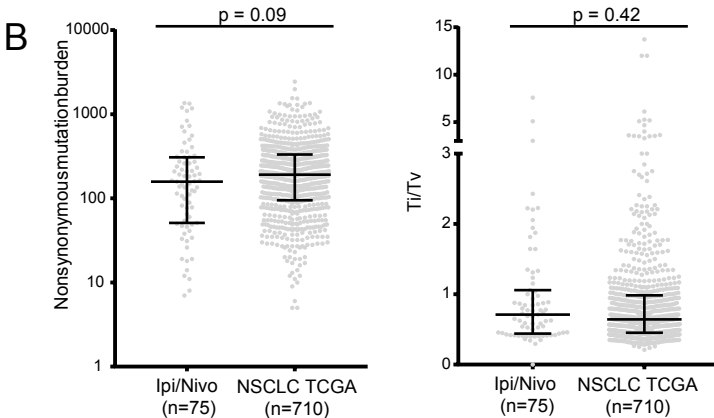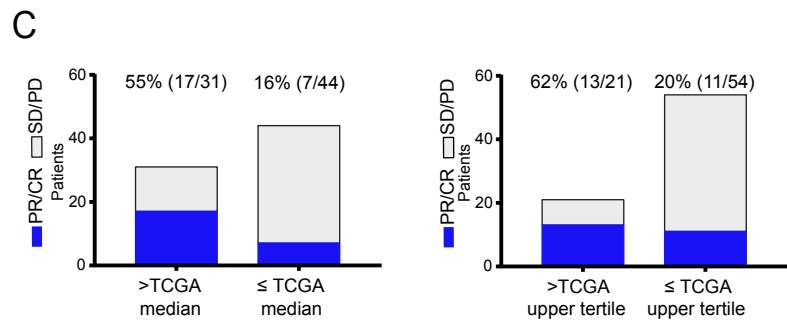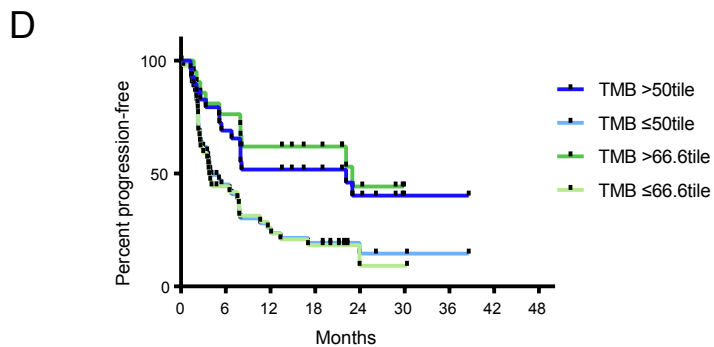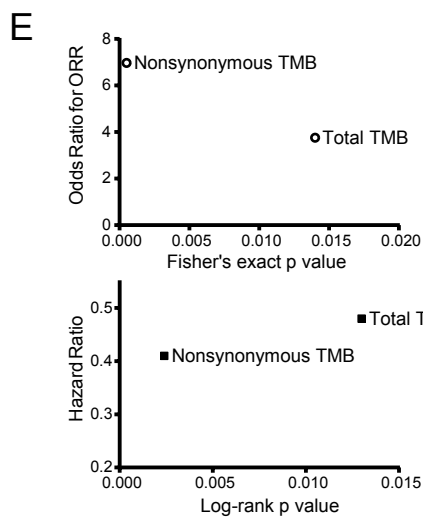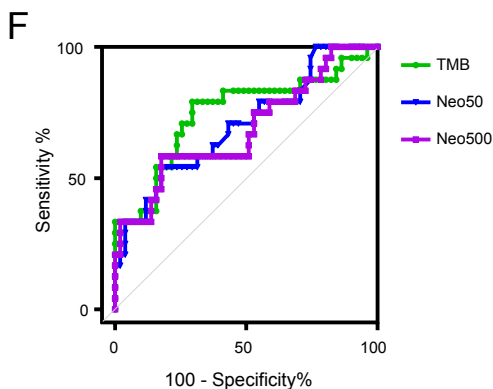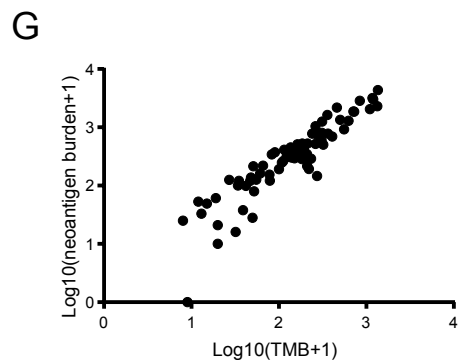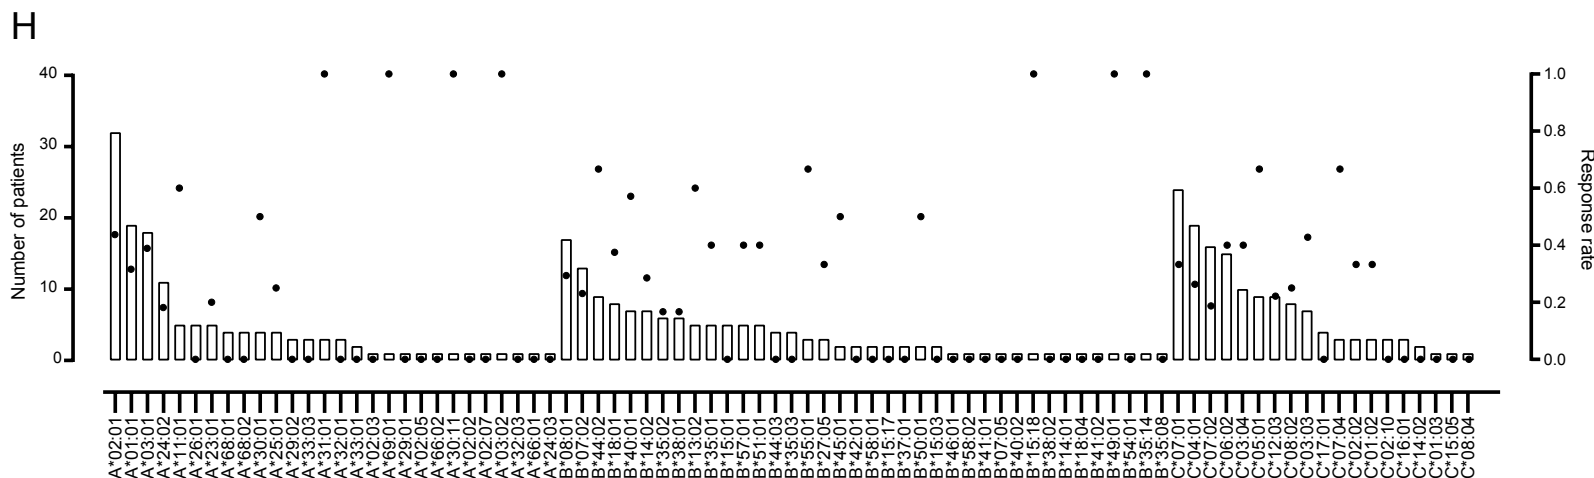

**Figure S2, related to Figure 1 and Figure 2:** (A) Mean target coverage (MTC) of tumor and matched normal by response category. MTC among responders (CR/PR) was similar to non-responders (SD/PD) for both tumor (136.3X vs 142.9X,  $p = 0.688$ ) and normal (76.64X vs 82.34X,  $p = 0.388$ ). Median and interquartile range are shown by the black bars. (B) The range of nonsynonymous mutation burden among NSCLCs profiled by WES in this study and NSCLCs profiled by TCGA project are shown in the left panel. Mutation burden was similar in this cohort (median 158 mutations [interquartile range (IQR) 51-307]) compared to the TCGA cohort (median 191 mutations [IQR 95-332],  $p = 0.09$ ). The right panel shows the distribution of transition/transversion ratio (Ti/Tv) in each group. The median transition/transversion (Ti/Tv) ratio among this cohort (0.71 [IQR 0.44-1.06]) was comparable to the TCGA cohort (0.64 [IQR 0.45-0.99],  $p = 0.42$ ). Black bars represent the median and interquartile range. (C) Objective response (CR/PR, blue) of the upper half or upper tertile of TMB among NSCLCs profiled by TCGA. The median TMB in NSCLC was 191 mutations and upper tertile was 266 mutations. Objective response was significantly greater among patients above the median (55% vs 16%, Odds ratio = 6.42 [95% CI 2.15-17.56], Fisher's exact  $p = 0.0008$ ) and upper tertile (62% vs 21%, Odds ratio = 6.35 [95% CI 2.24-17.56], Fisher's exact  $p = 0.0009$ ) compared to below, respectively. Percentages and rates (n/N) are shown above each bar. (D) PFS for patients with TMB above vs below the median and upper tertile was significantly improved (stratified by 50<sup>th</sup> percentile, median PFS 22.1 mo vs 3.8 mo, Mantel-Haenszel HR 0.44, log-rank  $p = 0.0047$ ; stratified by 66<sup>th</sup> percentile, median PFS 23.0 mo vs 4.1 mo, Mantel-Haenszel HR 0.42, log-rank  $p = 0.0028$ ). (E) Impact of nonsynonymous TMB versus total TMB (inclusive of silent variants) on outcomes. The Odds ratio for response above versus below the respective median TMBs was higher and more significant when using nonsynonymous variants relative to all variants (nonsynonymous TMB Odds ratio 6.97 [95% CI 2.19-19.02], Fisher's exact  $p = 0.0005$ ; total TMB Odds ratio 3.76 [95% CI 1.33-9.76], Fisher's exact  $p = 0.014$ ). The hazard ratio for PFS above versus below the respective median TMBs was higher and more significant when using nonsynonymous TMB relative to total TMB (nonsynonymous TMB Mantel-Haenszel HR 0.41, Log-rank  $p = 0.0024$ ; total TMB Mantel-Haenszel HR 0.48, Log-rank  $p = 0.013$ ). (F) ROC curves of objective response rate (CR/PR) using TMB (green line) (AUC = 0.75 [95% CI 0.62-0.88],  $p = 0.006$ ), neoantigen MHC binding affinity <50 nM (blue line) (AUC = 0.70 [95% CI 0.57-0.83],  $p = 0.0051$ ), and neoantigen MHC binding affinity <500 nM (purple line) (AUC = 0.69 [95% CI 0.55-0.82],  $p = 0.0093$ ). (G) Scatter plot depicting correlation of tumor mutation burden and neoantigen burden (spearman  $\rho = 0.92$  [95% CI 0.88-0.95],  $p < 0.0001$ ). Each dot represents an individual patient. Both variables are shown as  $\log_{10}(X+1)$  transformations, with +1 added to incorporate one patient with zero predicted neoantigens. (H) Association with HLA alleles and efficacy. The histogram depicts the number of patients with each HLA allele, grouped as HLA-A, B, and C, quantified by the left axis. The dot above each bar reflects the objective response among patients with each HLA allele, corresponding to the right axis. No clear pattern of association between HLA allele and response rate is evident.

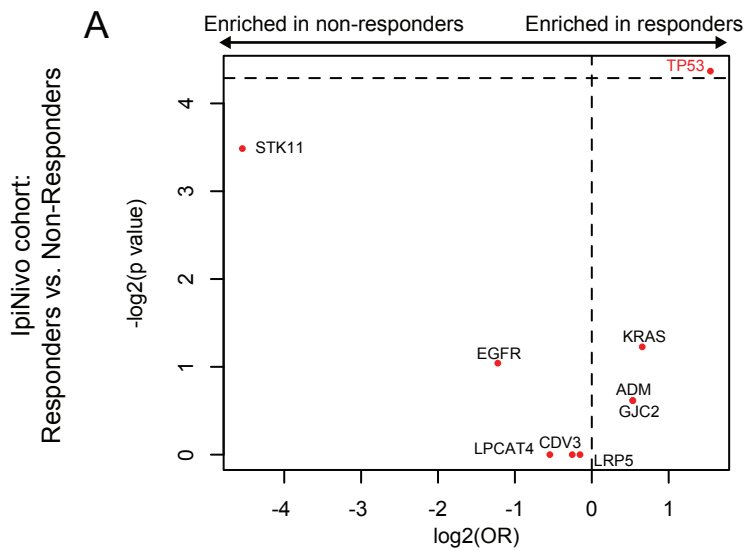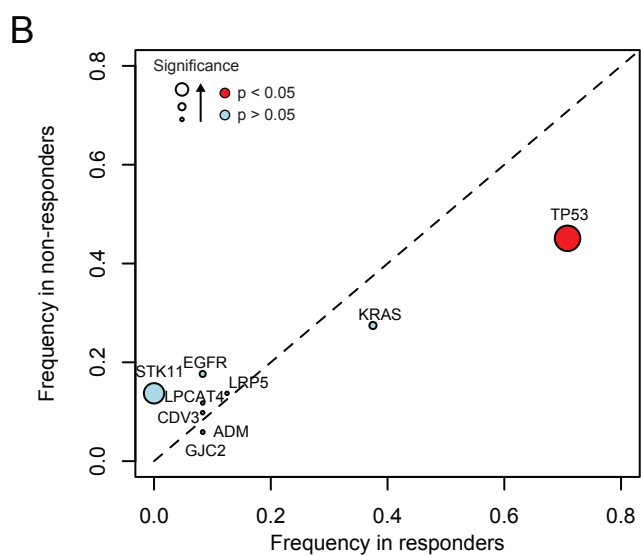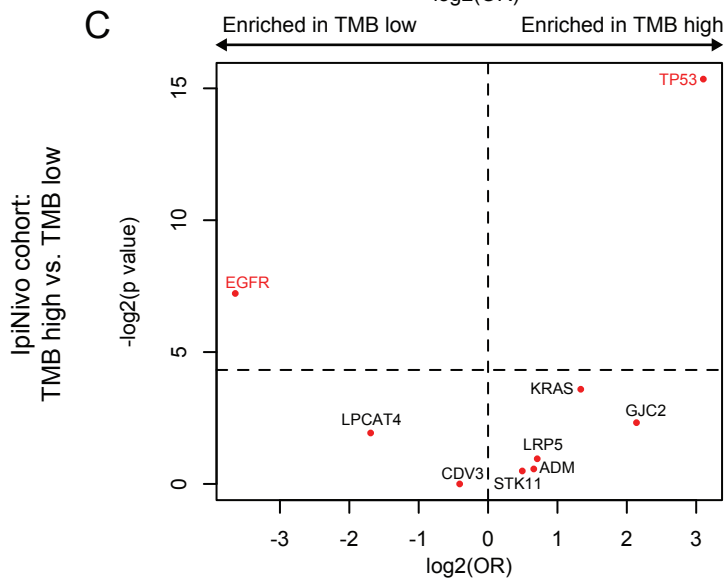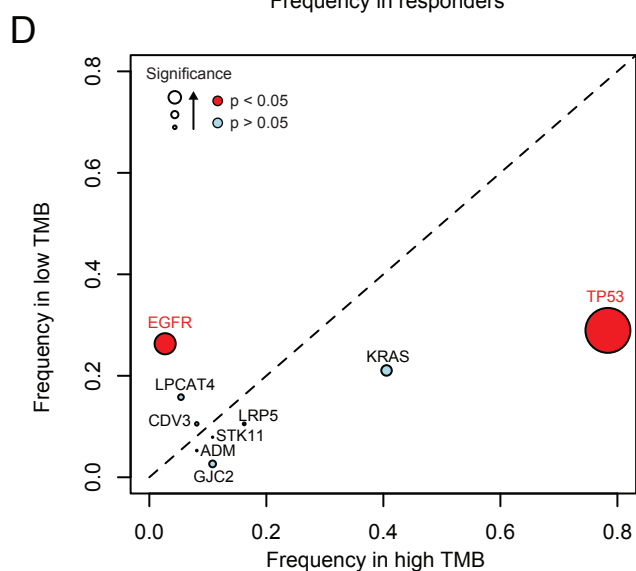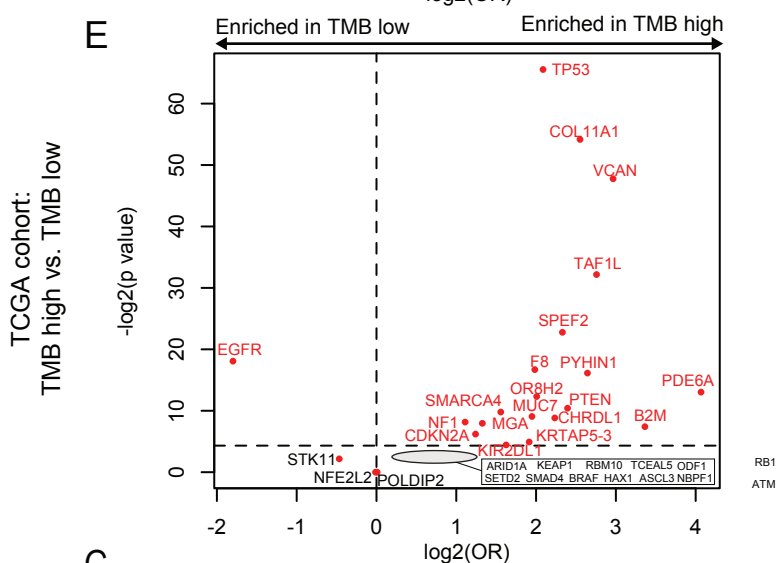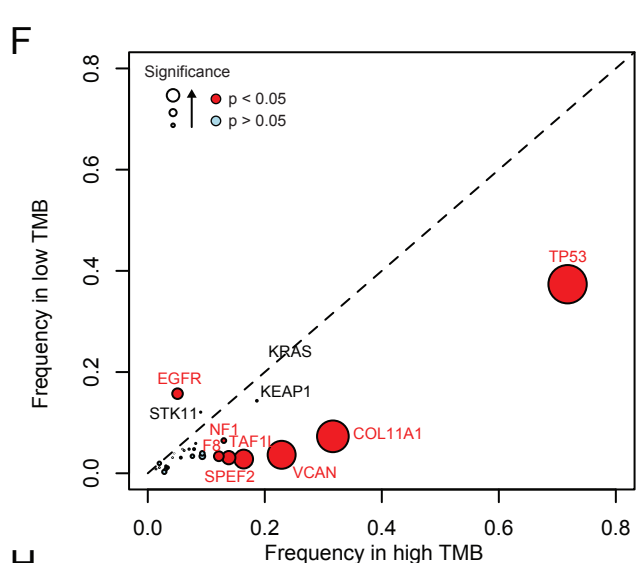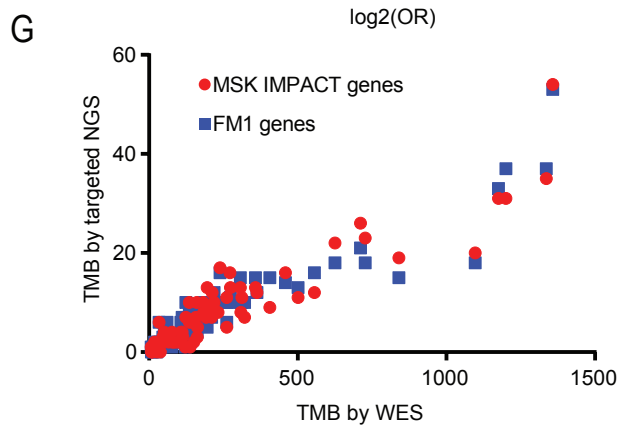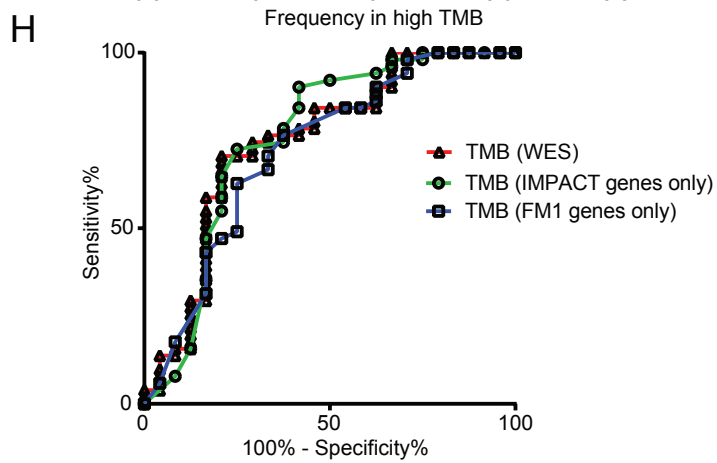

**Figure S3, related to Figure 2:** Analysis of recurrently altered genes identified by MutSigCV in ipi/nivo and NSCLC TCGA cohorts. **(A)** Plot showing log odd ratios (x axis) vs. log p values (y axis) for a comparison of frequency of recurrently altered genes in responders vs. non-responders (p value using Fisher's exact test). **(B)** Plot showing frequency of occurrence in responders (x axis) vs. non-responders (y axis). Only genes that had been found as recurrently mutated at statistically significant levels based on MutSigCV analysis are included in the analysis. Genes with  $p < 0.05$  are colored in red. **(C,D)** Same as **(A,B)** but comparing high TMB vs. low TMB samples ( $>$  vs  $\leq$  median of ipi/nivo cohort). **(E,F)** Same as **(C,D)**, but using recurrently altered genes identified in the NSCLC TCGA cohort and comparing high TMB vs. low TMB samples ( $>$  vs  $\leq$  median of NSCLC TCGA cohort). **(G)** TMB quantified by WES correlates with the estimate of TMB using *in silico* filtering of genes represented in the MSK-IMPACT or FoundationOne panels (MSK-IMPACT Spearman rho 0.91 [95% CI 0.85-0.94],  $p < 0.0001$ ; FM1 Spearman rho 0.93 [95% CI 0.88-0.95],  $p < 0.0001$ ). Each dot represents an individual patient. **(H)** ROC curves depicting the correlation of objective response with TMB by WES (AUC = 0.75 [95% CI 0.62-0.88],  $p = 0.0006$ ) and TMB estimated using genes represented in the MSK-IMPACT panel (AUC = 0.76 [95% CI 0.62-0.89],  $p = 0.0003$ ) or FoundationOne Panel (AUC = 0.72 [95% CI 0.59-0.85],  $p = 0.002$ ).

**A****ORR**

| Model        | Covariates                              | Odds Ratio | p value          | AUC   |
|--------------|-----------------------------------------|------------|------------------|-------|
| Univariate   | Mutation burden (binary, > vs ≤ median) | 6.97       | <b>&lt;0.001</b> | 0.719 |
| Multivariate | Mutation burden (binary, > vs ≤ median) | 7.86       | <b>0.003</b>     | 0.838 |
|              | PD-L1 (> 0 vs 0)                        | 3.37       | 0.075            |       |
|              | Histology (SQ vs non-SQ)                | 1.50       | 0.611            |       |
|              | Smoking (ever vs never)                 | 4.16       | 0.271            |       |
|              | Performance status (ECOG 0 vs 1)        | 3.24       | 0.073            |       |
|              | Tumor burden (binary, > vs ≤ median)    | 0.45       | 0.230            |       |

| Model        | Covariates                       | Odds Ratio | p value      | AUC   |
|--------------|----------------------------------|------------|--------------|-------|
| Univariate   | Mutation burden (continuous)     | 1.004      | <b>0.002</b> | 0.748 |
| Multivariate | Mutation burden (continuous)     | 1.005      | <b>0.001</b> | 0.869 |
|              | PD-L1 (continuous)               | 1.03       | <b>0.024</b> |       |
|              | Histology (SQ vs non-SQ)         | 1.58       | 0.592        |       |
|              | Smoking (ever vs never)          | 22.6       | 0.139        |       |
|              | Performance status (ECOG 0 vs 1) | 1.82       | 0.409        |       |
|              | Tumor burden (continuous)        | 0.99       | 0.283        |       |

**PFS**

| Model        | Covariates                              | Odds Ratio | p value      | AUC   |
|--------------|-----------------------------------------|------------|--------------|-------|
| Univariate   | Mutation burden (binary, > vs ≤ median) | 0.42       | <b>0.003</b> | 0.61  |
| Multivariate | Mutation burden (binary, > vs ≤ median) | 0.37       | <b>0.004</b> | 0.659 |
|              | PD-L1 (> 0 vs 0)                        | 1.05       | 0.892        |       |
|              | Histology (SQ vs non-SQ)                | 0.82       | 0.620        |       |
|              | Smoking (ever vs never)                 | 0.87       | 0.722        |       |
|              | Performance status (ECOG 0 vs 1)        | 0.65       | 0.199        |       |
|              | Tumor burden (binary, > vs ≤ median)    | 1.44       | 0.252        |       |

| Model        | Covariates                       | Odds Ratio | p value      | AUC   |
|--------------|----------------------------------|------------|--------------|-------|
| Univariate   | Mutation burden (continuous)     | 0.998      | <b>0.004</b> | 0.61  |
| Multivariate | Mutation burden (continuous)     | 0.998      | <b>0.002</b> | 0.711 |
|              | PD-L1 (continuous)               | 0.99       | <b>0.030</b> |       |
|              | Histology (SQ vs non-SQ)         | 0.77       | 0.531        |       |
|              | Smoking (ever vs never)          | 0.74       | 0.448        |       |
|              | Performance status (ECOG 0 vs 1) | 0.71       | 0.323        |       |
|              | Tumor burden (continuous)        | 1.01       | 0.067        |       |

**B**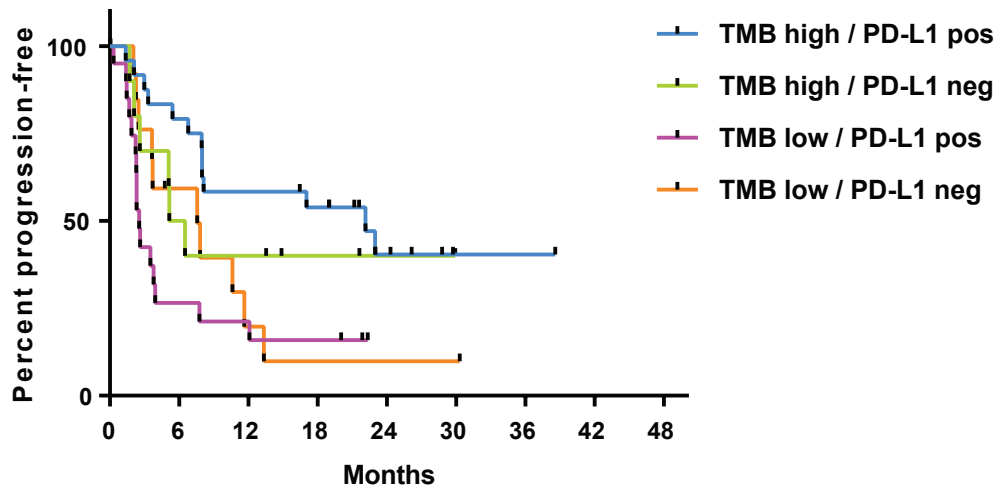**C**

**Before  
Nivolumab plus  
Ipilimumab Therapy**

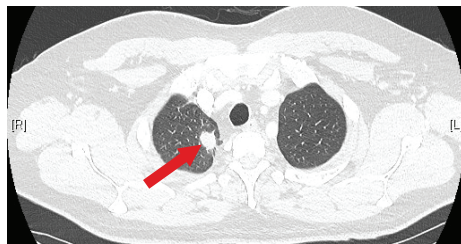

**Following  
Nivolumab plus  
Ipilimumab Therapy**

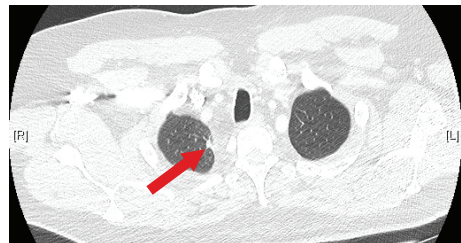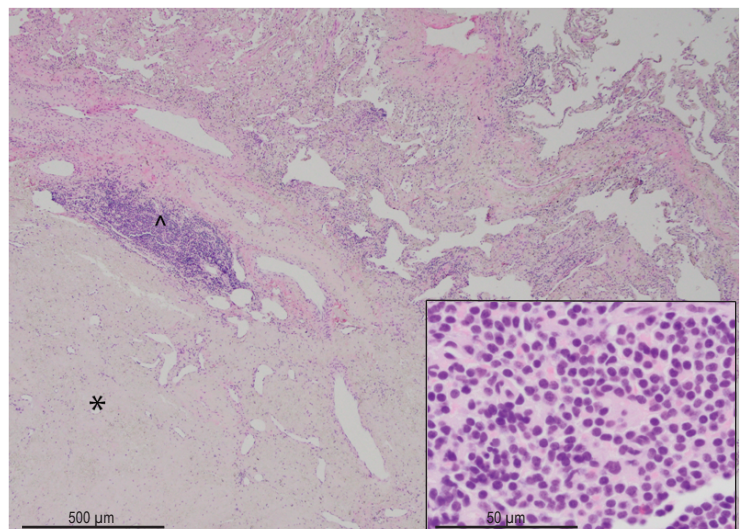

**Figure S4, related to Figure 3:** (A) Tables for multivariate analysis of TMB on ORR and PFS using mutation burden, PD-L1 expression, histology, smoking status, performance status, and tumor burden (sum unidirectional size of target lesions). In a univariate analysis using mutation burden (as a binary or continuous variable), both objective response and progression-free survival significantly associate with TMB. In a multivariate analysis, significant associations remained with respect to TMB for both ORR and PFS. (B) Progression-free survival of patients with TMB and PD-L1 expression as a composite variable (log-rank for trend  $p = 0.0057$ ). TMB high is defined as  $>$  median and PD-L1 positive is defined as  $\geq 1\%$  tumor expression. (C) Case of patient whose tumor is PD-L1 negative (0% tumor expression) and TMB high (840 nonsynonymous mutations, 95<sup>th</sup> percentile of TCGA NSCLCs) who achieved a complete pathologic response to nivolumab plus ipilimumab. Top panel shows lesion prior to and following initiation of therapy. The bottom panel shows representative histology at time of resection of remaining residual disease. The tumor bed (40x; H&E stain) is characterized by fibroelastotic scar (\*) with adjacent aggregates of chronic inflammatory cells at the periphery (^). The aggregates of inflammatory cells are composed predominantly of lymphocytes (inset; 400x).
